# Supplementary material
Source: PubMed Central journal article supplement (PMC3000593)
Supplement: NIHMS28624-supplement-1.pdf [file NIHMS28624-supplement-1.pdf]

### 1411H

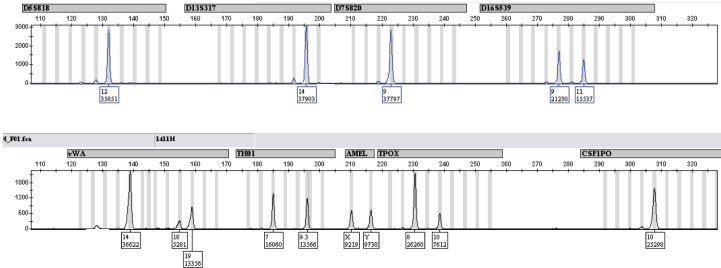

D5S818: 12; D13S317: 14; D7S820: 9;  
 D16S539: 9,11; vWA: 14,18,19; TH01: 7,9,3;  
 TPOX: 8,10; CSF1PO: 10; Amelogenin: X,Y

### GCT44

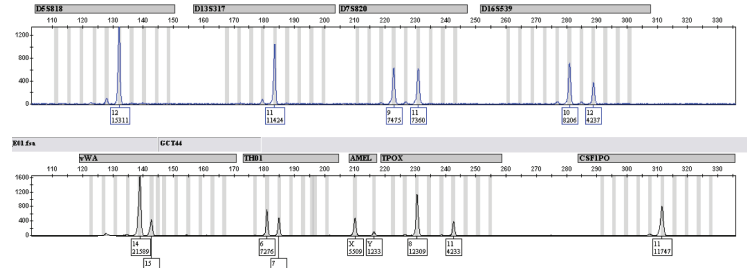

D5S818: 12; D13S317: 11; D7S820: 9,11;  
 D16S539: 10,12; vWA: 14,15; TH01: 6,7;  
 TPOX: 8,11; CSF1PO: 11; Amelogenin: X,Y

### TCam-2

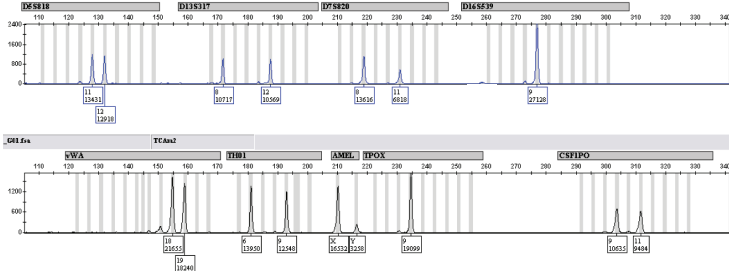

D5S818: 11,12; D13S317: 8,12; D7S820: 8,11;  
 D16S539: 9; vWA: 18,19; TH01: 6,9; TPOX: 9;  
 CSF1PO: 9,11; Amelogenin: X,Y

### 2102Ep

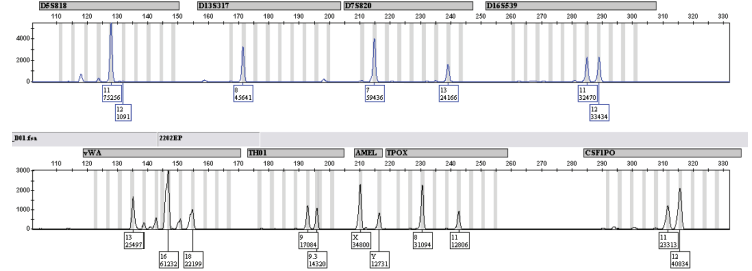

D5S818: 11; D13S317: 8; D7S820: 7,13;  
 D16S539: 11,12; vWA: 13,16,18; TH01: 9,9,3;  
 TPOX: 8,11; CSF1PO: 11,12; Amelogenin: X,Y

### Tera2

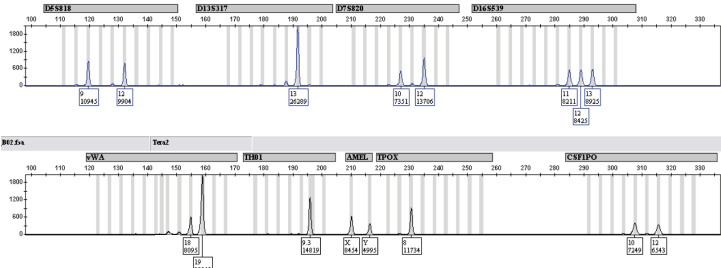

D5S818: 9,12; D13S317: 13; D7S820: 10,12;  
 D16S539: 11,12,13; vWA: 18,19; TH01: 9,3;  
 TPOX: 8; CSF1PO: 10,12; Amelogenin: X,Y

### PA-1

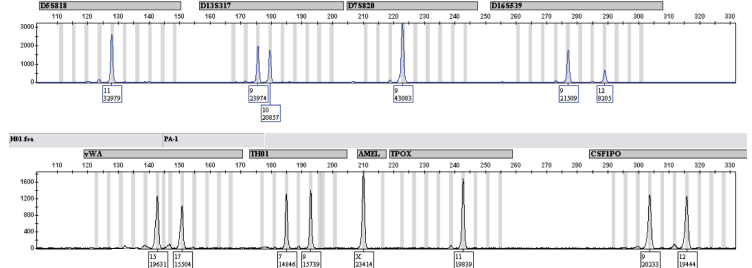

D5S818: 11; D13S317: 9,10; D7S820: 9;  
 D16S539: 9,12; vWA: 15,17; TH01: 7,9;  
 TPOX: 11; CSF1PO: 9,12; Amelogenin: X

Palmer\_Suppl\_Fig\_S2

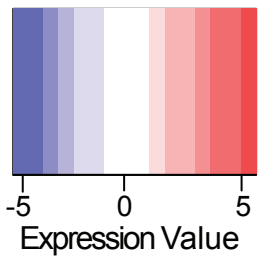

- YSTs
- Seminomas
- ECs
- Teratomas
- Controls

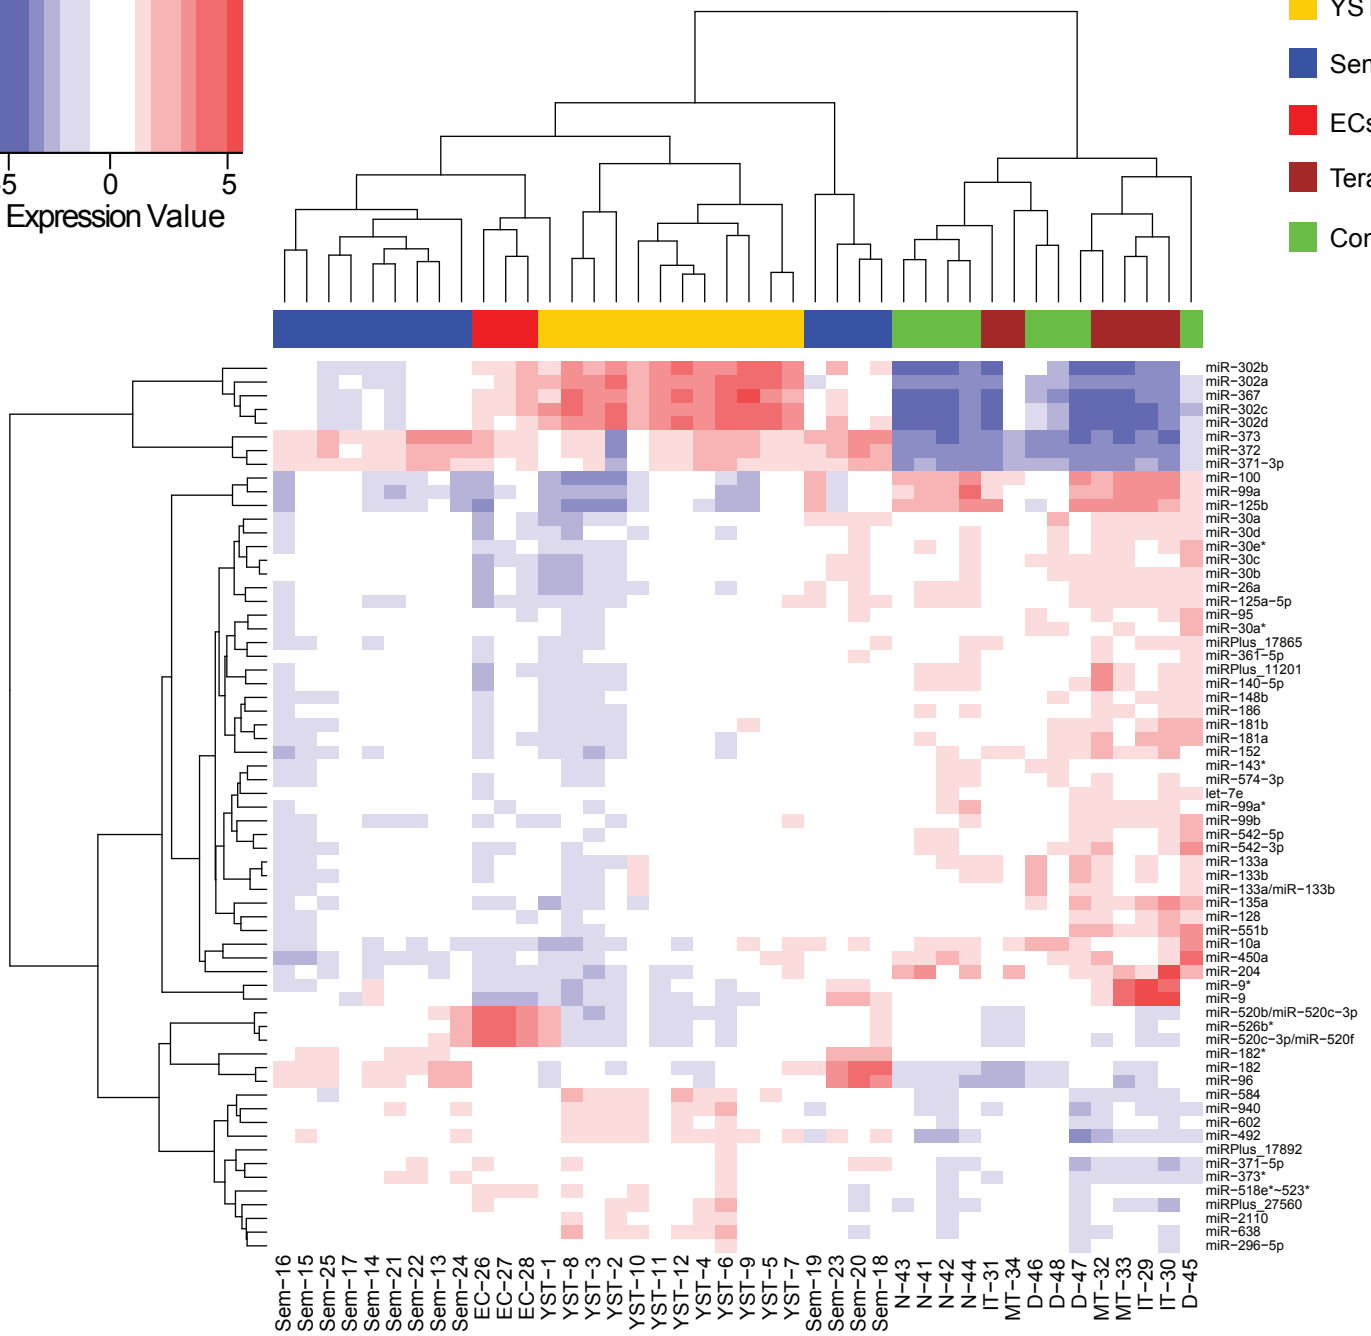

A

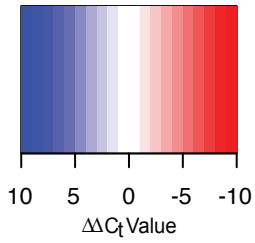

- YSTs
- Seminomas
- ECs
- Cell Lines
- Teratomas
- Controls

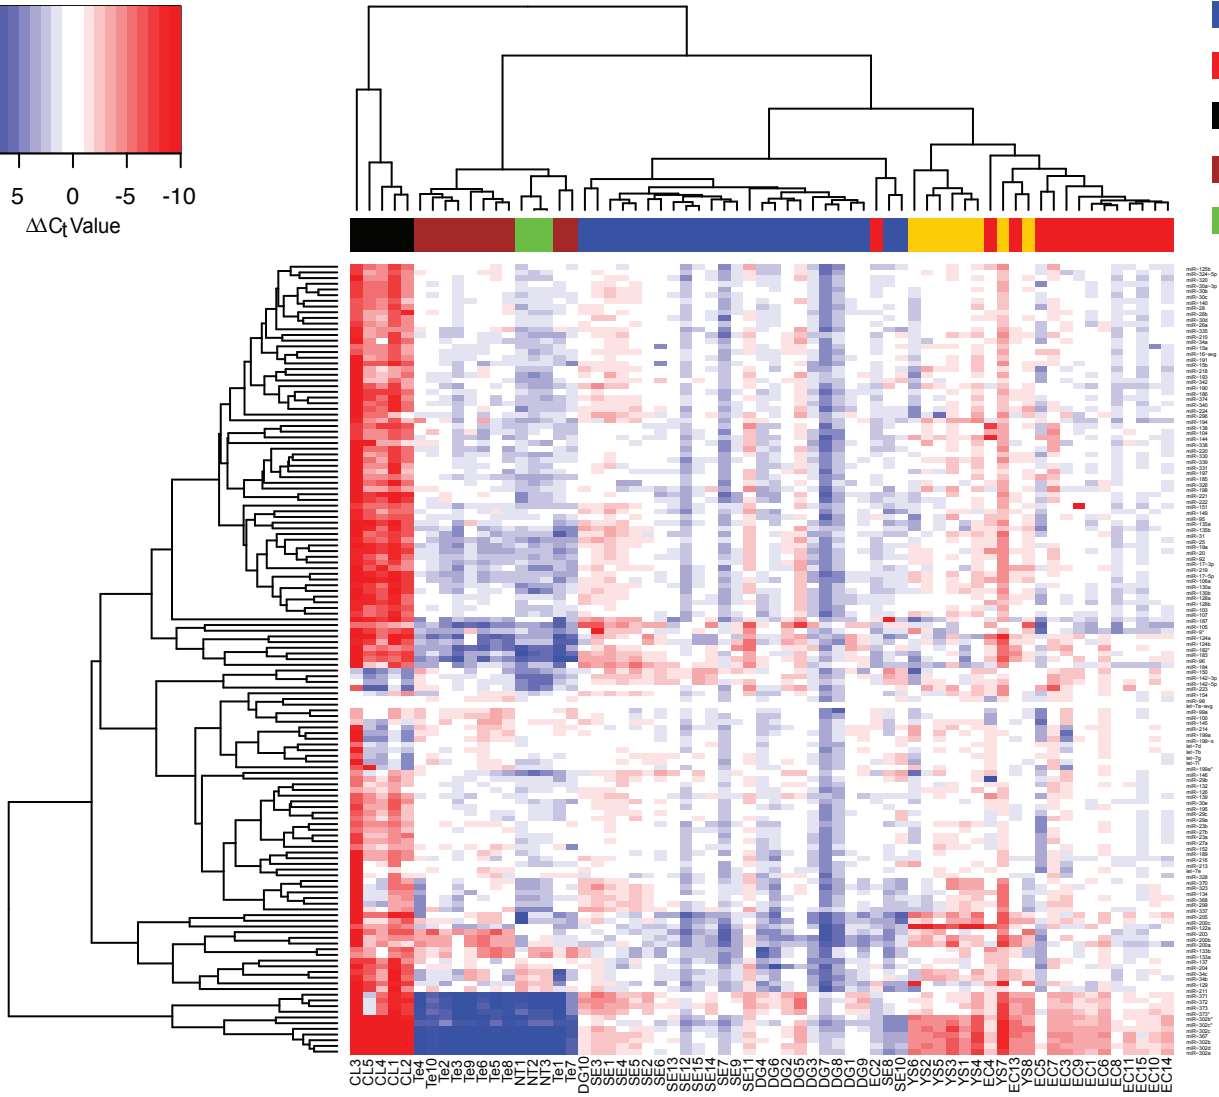

B

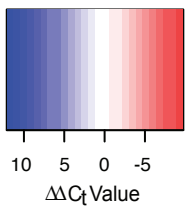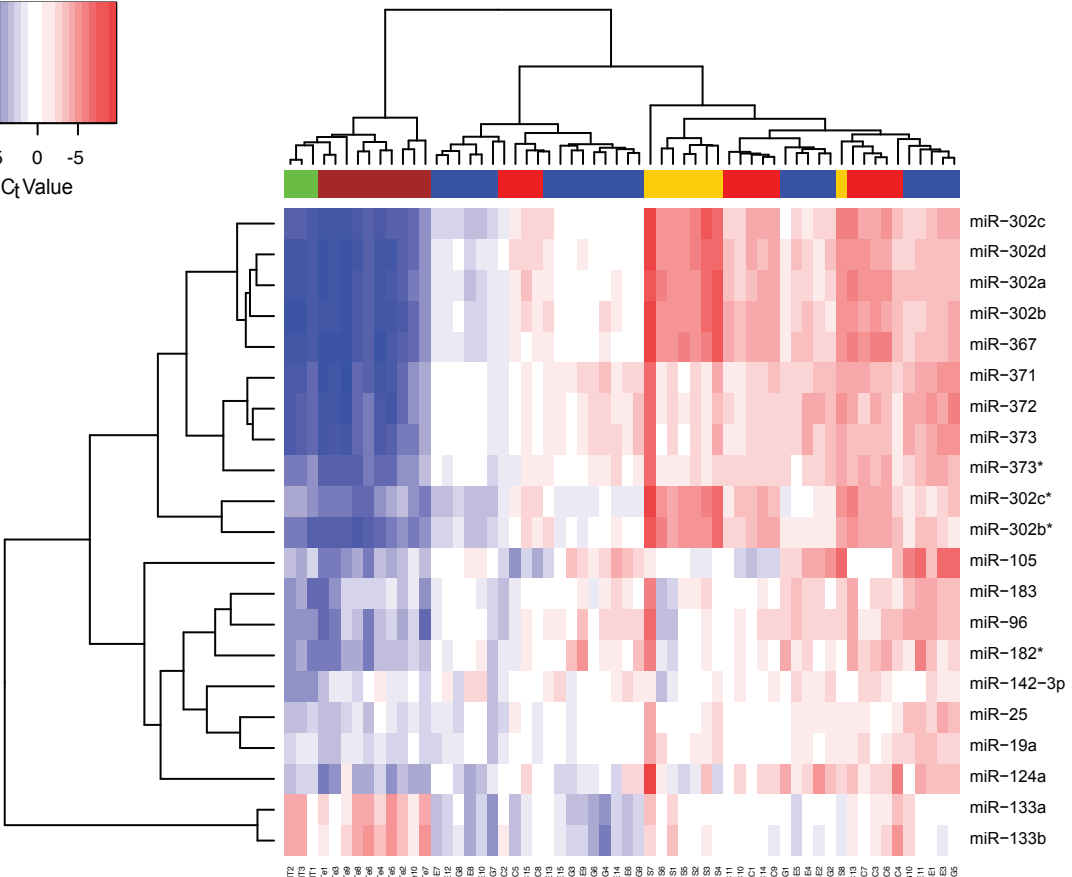

- miR-302c
- miR-302d
- miR-302a
- miR-302b
- miR-367
- miR-371
- miR-372
- miR-373
- miR-373\*
- miR-302c\*
- miR-302b\*
- miR-105
- miR-183
- miR-96
- miR-182\*
- miR-142-3p
- miR-25
- miR-19a
- miR-124a
- miR-133a
- miR-133b

A

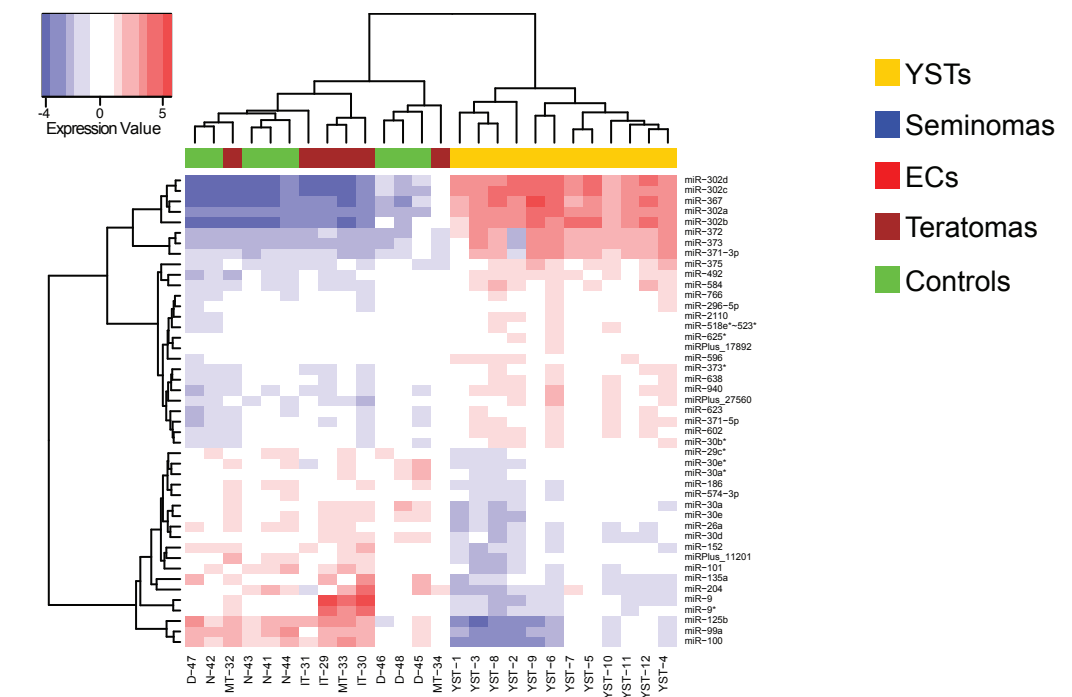

B

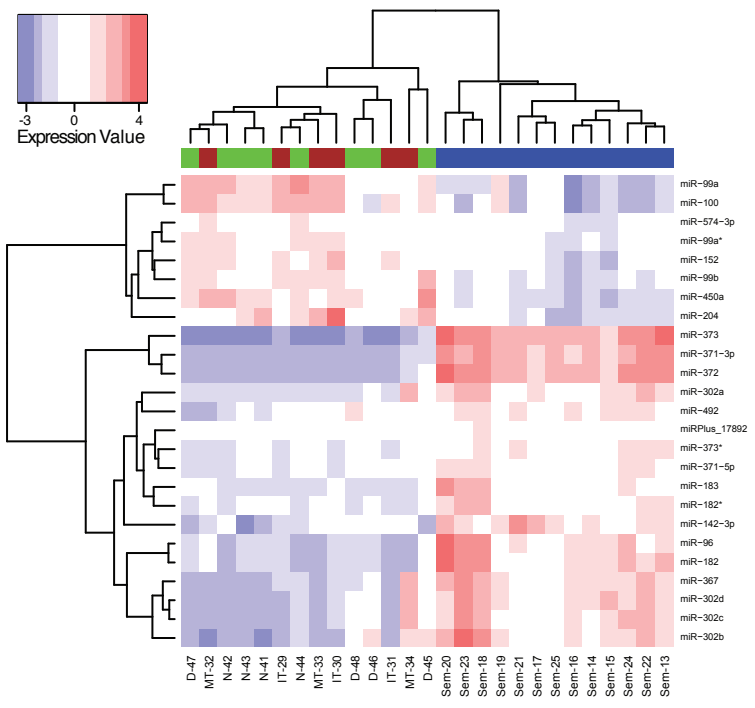

C

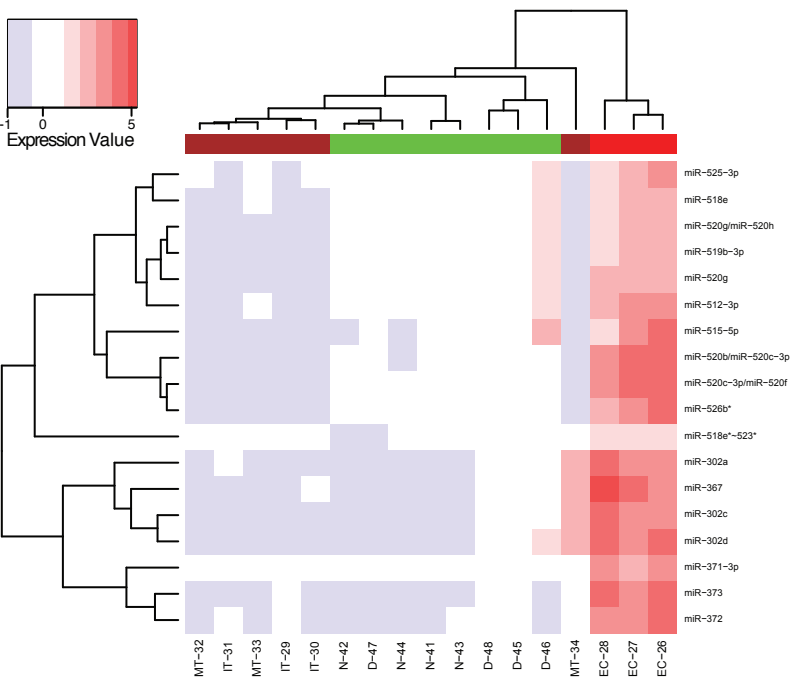

**A** miR-372 expression referenced to IT-30 sample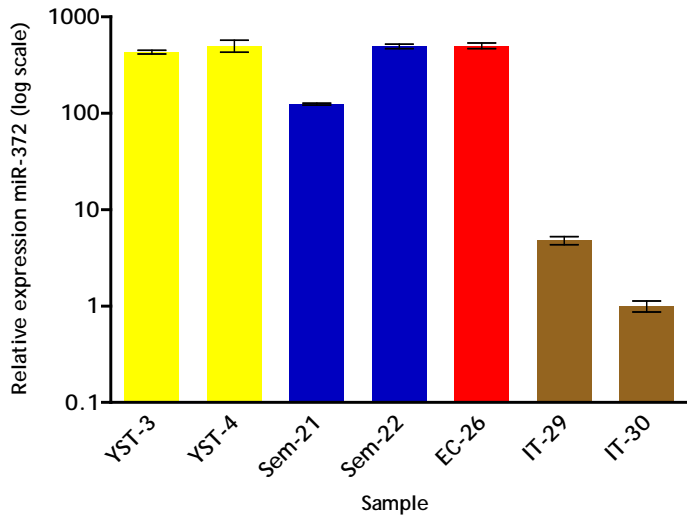**B** miR-302b expression referenced to IT-30 sample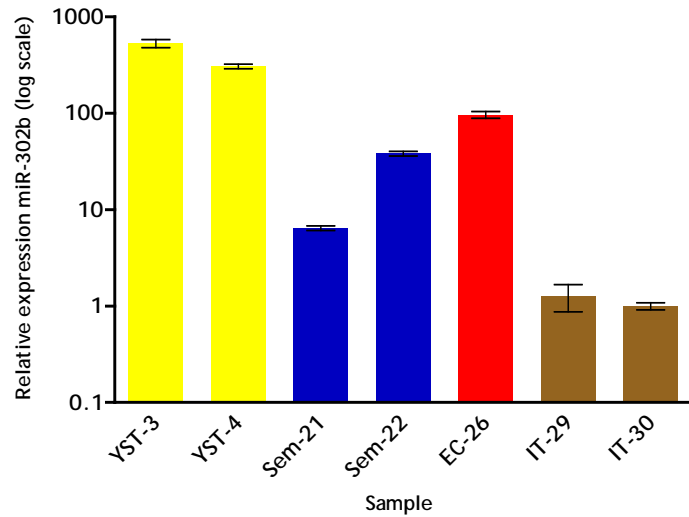**C** miR-204 expression referenced to Sem-21 sample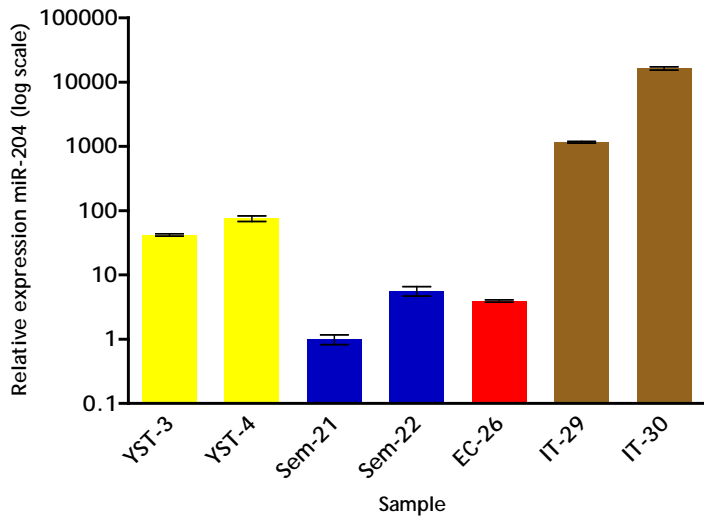**D** miR-451 expression referenced to Sem-19 sample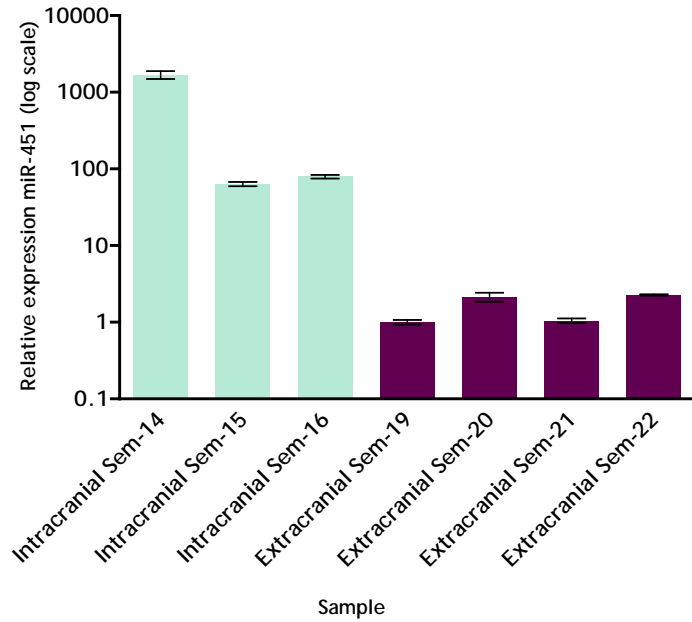

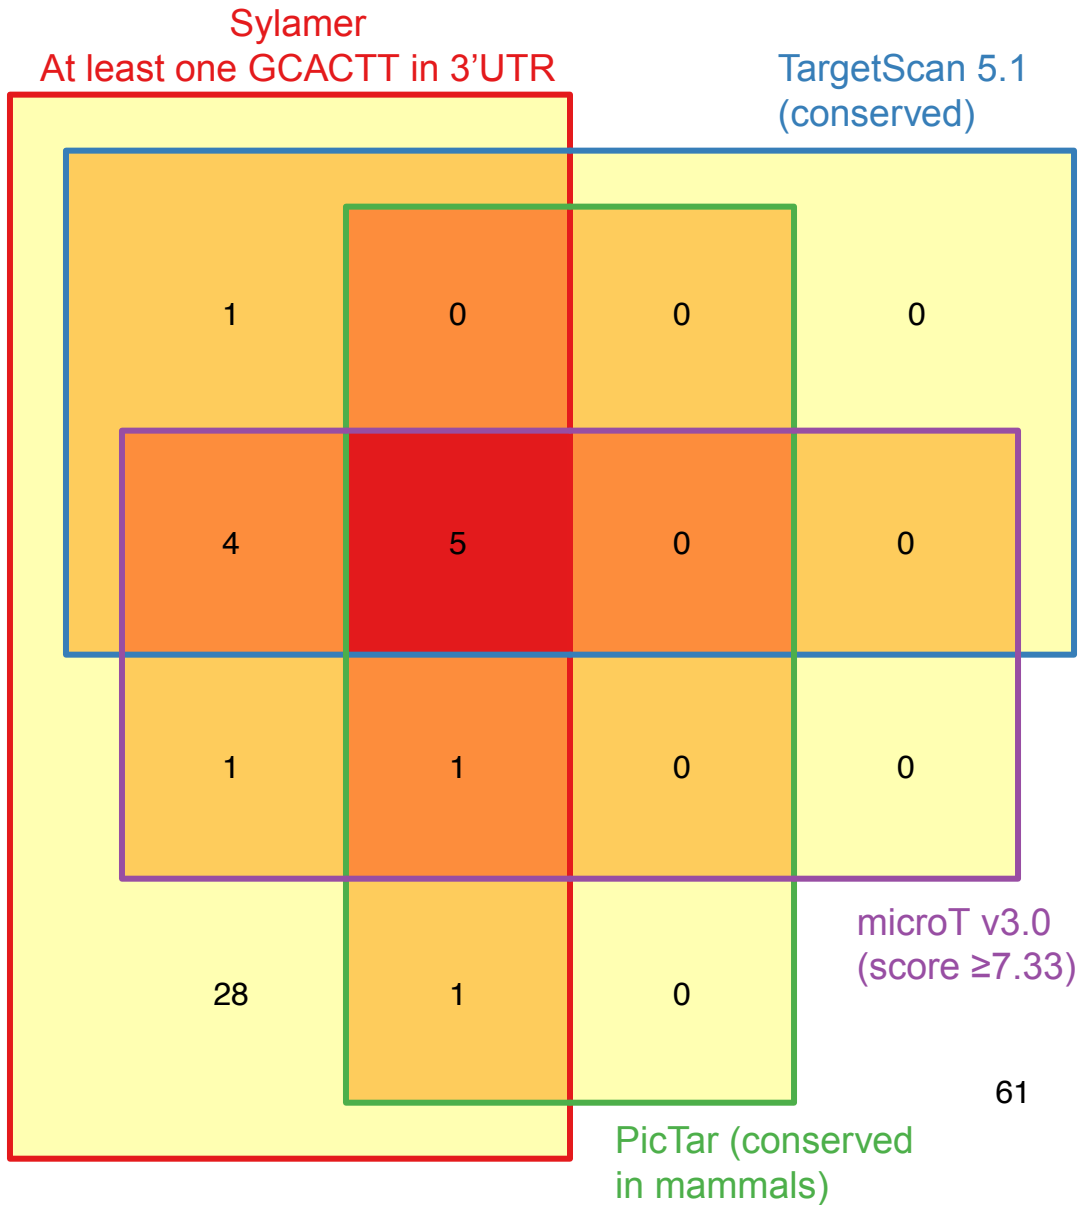

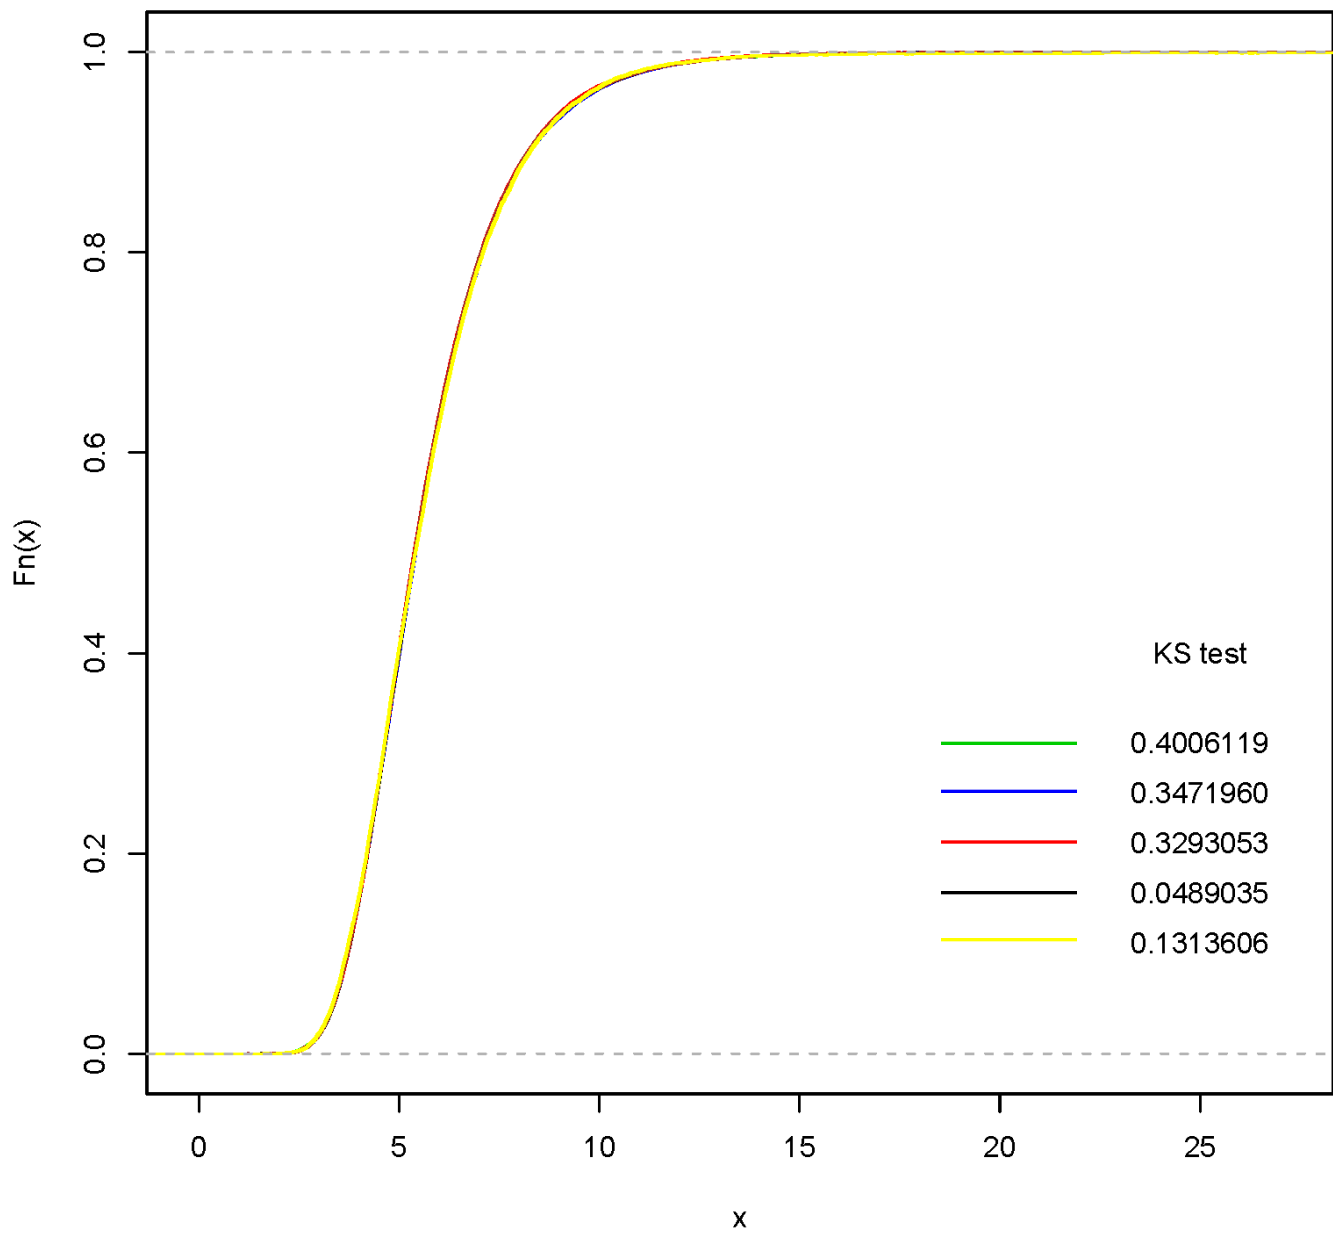

**A**

Pediatric YST versus Controls; SCR for let-7 family seed; score: -13.132;  $p$ -value  $1.18 \times 10^{-3}$

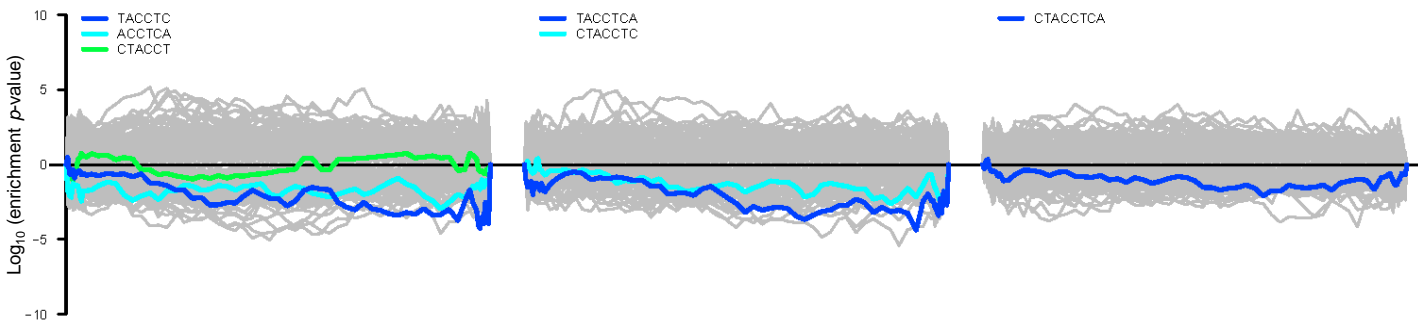

**B**

Pediatric Seminoma versus Controls; SCR for miR-181 family seed; score: -11.227;  $p$ -value  $2.45 \times 10^{-3}$

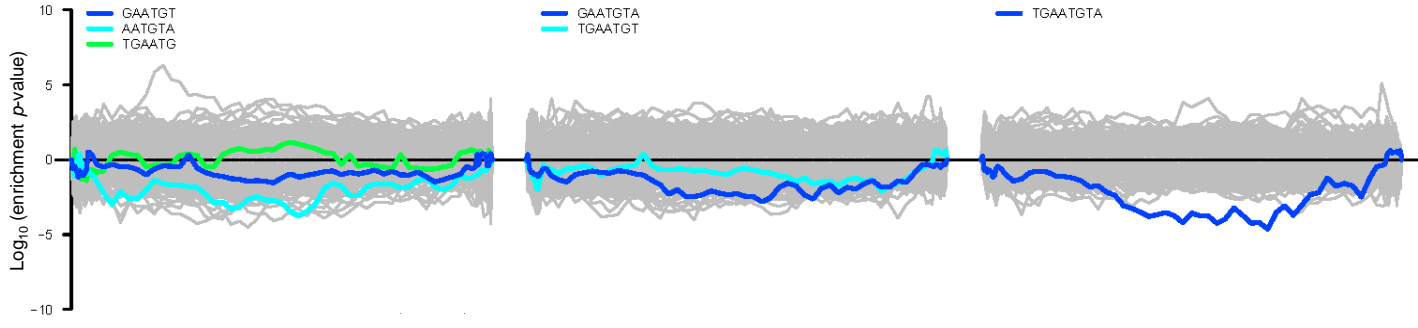

**C**

Adult malignant TGCT versus Controls; SCR for miR-145 seed; score: -12.013;  $p$ -value  $4.56 \times 10^{-4}$

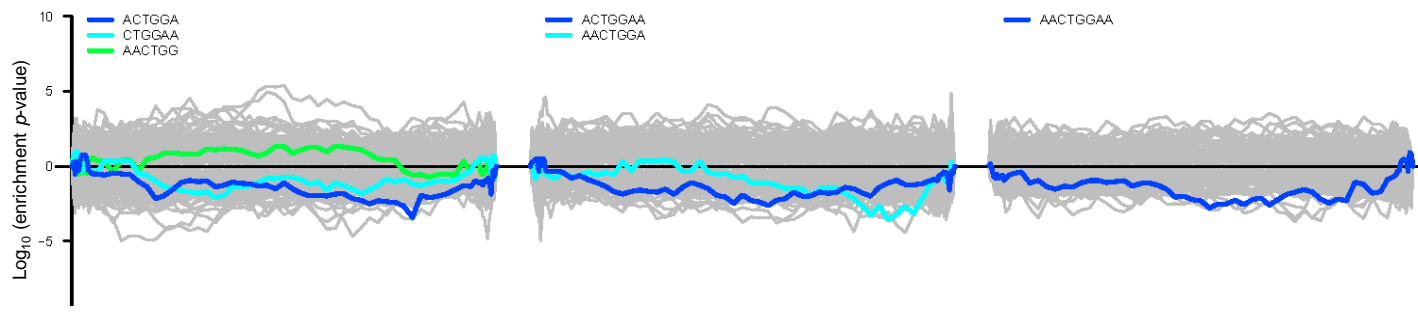



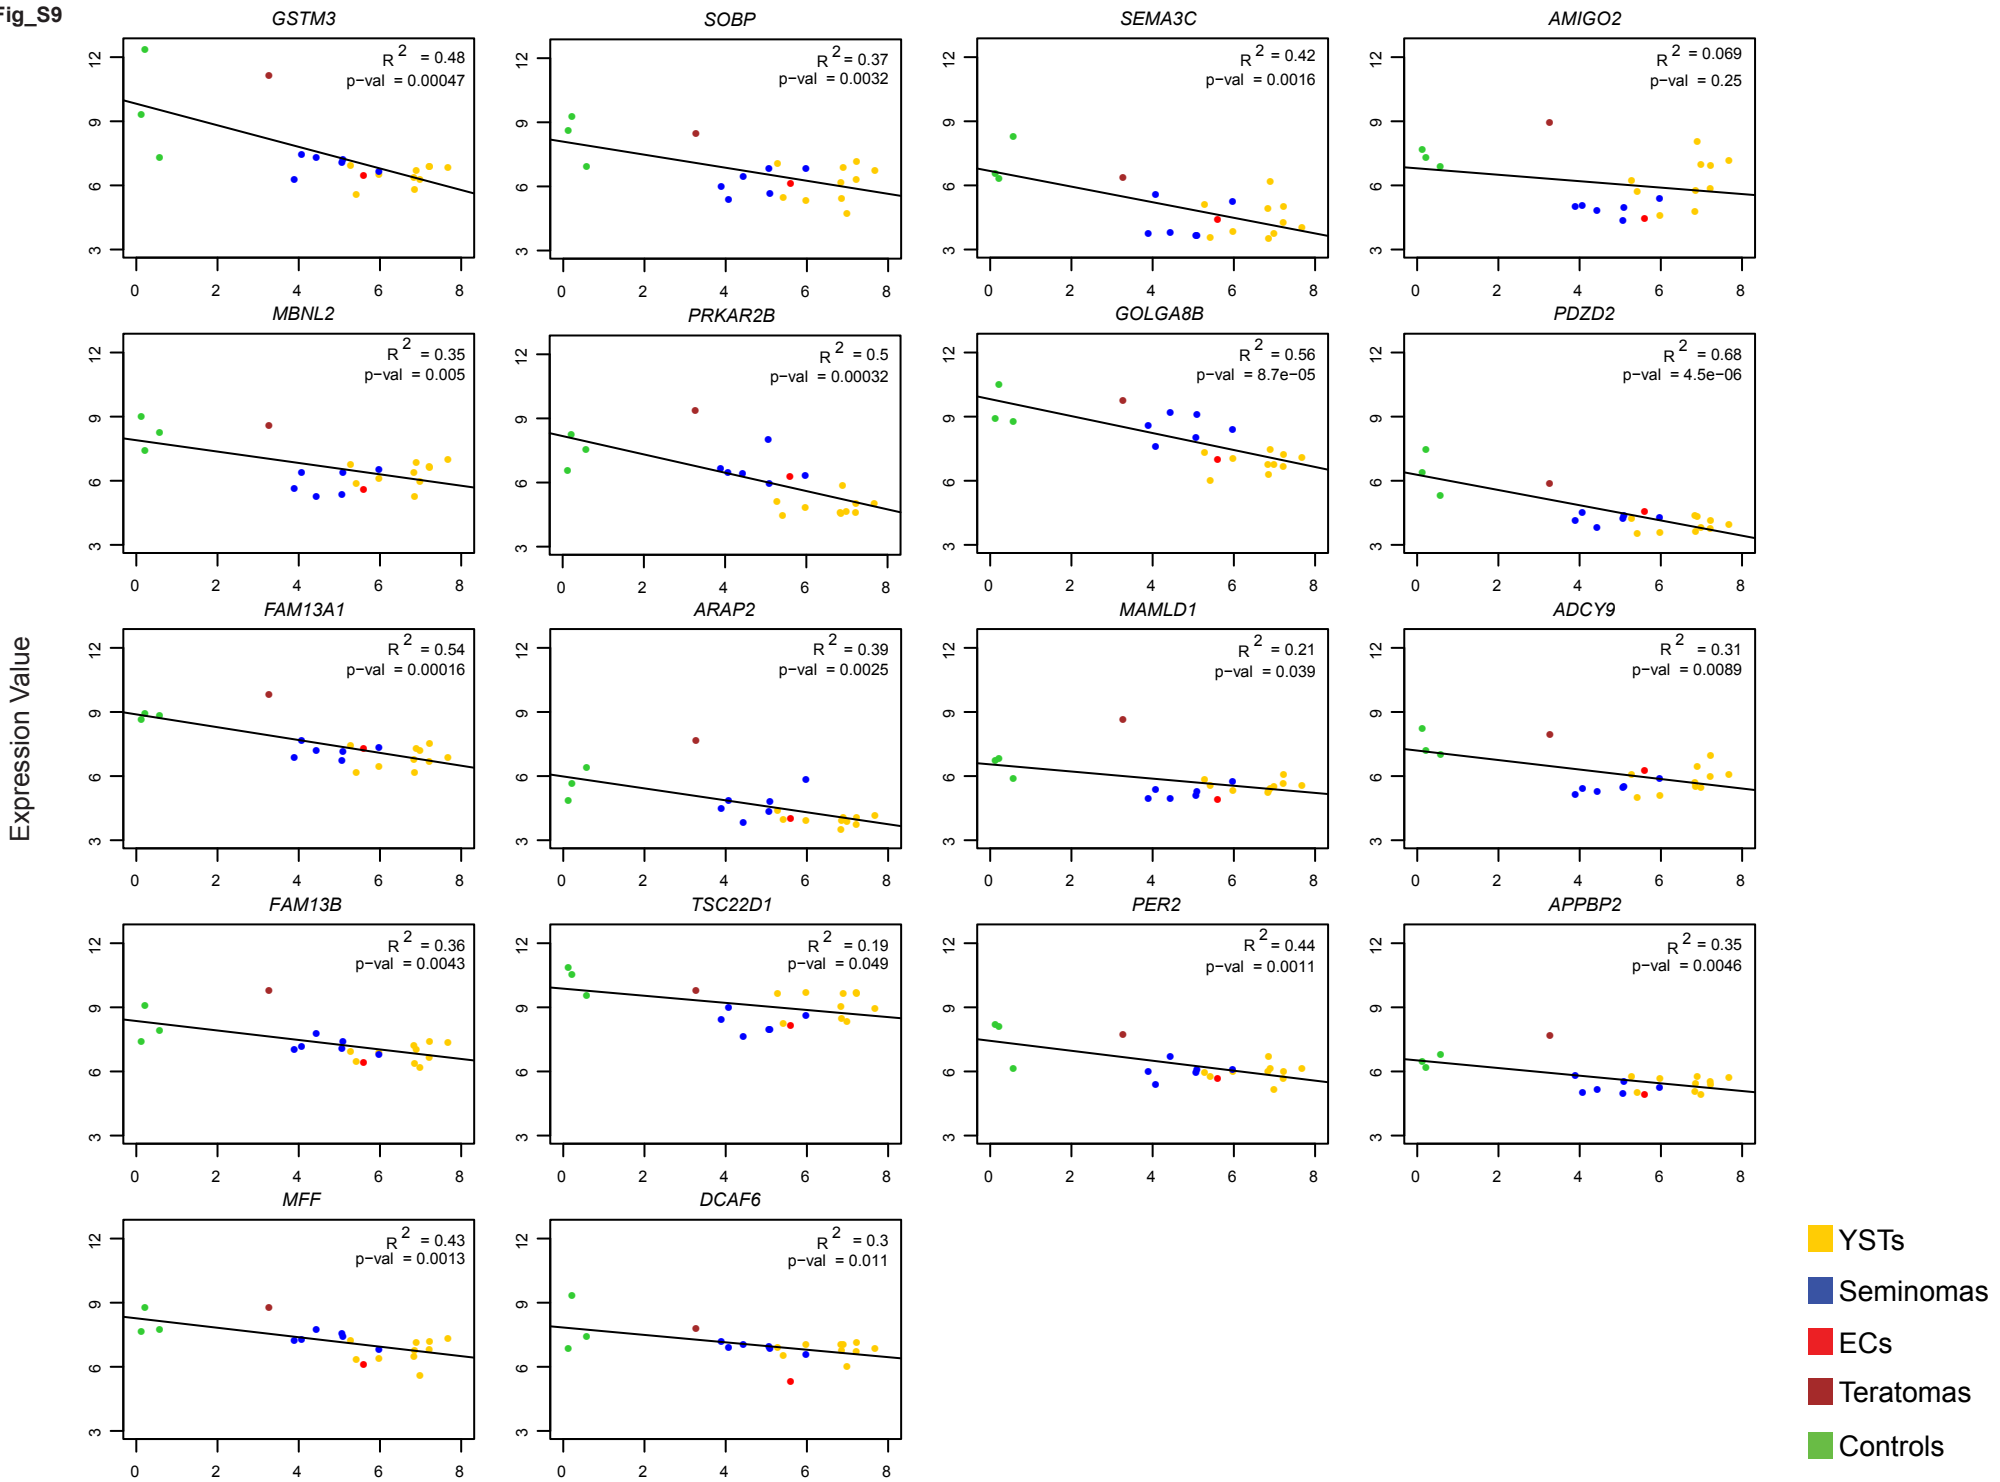

**Palmer\_Suppl\_ Table\_S1**

| Sample | Histology              | Code   | Tumor composition | Site         | Gender | Age (y) | Stage | mRNA profiling |
|--------|------------------------|--------|-------------------|--------------|--------|---------|-------|----------------|
| 1      | YST                    | YST-1  | Mixed, with MT    | CNS          | M      | 12      | 1     | ✓              |
| 2      | YST                    | YST-2  | Mixed, with MT    | SCT          | F      | 3       | 4     | ✓              |
| 3      | YST                    | YST-3  | Pure              | Testis       | M      | 2       | 1     | ✓              |
| 4      | YST                    | YST-4  | Pure              | Ovary        | F      | 13      | 3     | ✓              |
| 5      | YST                    | YST-5  | Pure              | Ovary        | F      | 12      | 1     | ✓              |
| 6      | YST                    | YST-6  | Pure              | Testis       | M      | 4       | 1     | ✓              |
| 7      | YST                    | YST-7  | Pure              | Testis       | M      | 0       | 1     | ✓              |
| 8      | YST                    | YST-8  | Mixed, with MT    | SCT          | F      | 2       | 4     | ✓              |
| 9      | YST                    | YST-9  | Pure              | Ovary        | F      | 4       | 4     |                |
| 10     | YST                    | YST-10 | Pure              | Ovary        | F      | 0       | 2     | ✓              |
| 11     | YST                    | YST-11 | Pure              | Ovary        | F      | 14      | 1     | ✓              |
| 12     | YST                    | YST-12 | Pure              | Vagina       | F      | 1       | 1     |                |
| 13     | Seminoma               | Sem-13 | Pure              | Ovary        | F      | 12      | 1     | ✓              |
| 14     | Seminoma               | Sem-14 | Pure              | CNS          | F      | 10      | 1     | ✓              |
| 15     | Seminoma               | Sem-15 | Pure              | CNS          | M      | 16      | 1     | ✓              |
| 16     | Seminoma               | Sem-16 | Pure              | CNS          | M      | 12      | 1     |                |
| 17     | Seminoma               | Sem-17 | Pure              | Testis       | M      | 25      | 1     |                |
| 18     | Seminoma               | Sem-18 | Pure              | Testis       | M      | 35      | 1     |                |
| 19     | Seminoma               | Sem-19 | Pure              | Ovary        | F      | 8       | N/A   |                |
| 20     | Seminoma               | Sem-20 | Pure              | Ovary        | F      | 9       | 3     |                |
| 21     | Seminoma               | Sem-21 | Pure              | Metastasis # | F      | 11      | 4     |                |
| 22     | Seminoma               | Sem-22 | Pure              | Ovary        | F      | 14      | 3     |                |
| 23     | Seminoma               | Sem-23 | Pure              | Ovary        | F      | 13      | 3     | ✓              |
| 24     | Seminoma               | Sem-24 | Pure              | Ovary        | F      | 12      | 1     | ✓              |
| 25     | Seminoma               | Sem-25 | Pure              | Ovary        | F      | 13      | 1     | ✓              |
| 26     | EC                     | EC-26  | Pure              | Metastasis # | M      | 15      | 4     | ✓*             |
| 27     | EC                     | EC-27  | Pure              | Testis       | M      | 15      | N/A   |                |
| 28     | EC                     | EC-28  | Pure              | Testis       | M      | 13      | 4     |                |
| 29     | IT                     | IT-29  | Pure              | Ovary        | F      | 0       | -     |                |
| 30     | IT                     | IT-30  | Pure              | Ovary        | F      | 15      | -     |                |
| 31     | IT                     | IT-31  | Pure              | Abdominal    | M      | 0       | -     |                |
| 32     | MT                     | MT-32  | Pure              | SCT          | F      | 0       | -     |                |
| 33     | MT                     | MT-33  | Pure              | Ovary        | F      | 3       | -     |                |
| 34     | MT                     | MT-34  | Mixed, with YST   | Ovary        | F      | 12      | -     | ✓*             |
| 35     | Tera-2 (EC)            | CL-35  | -                 | Cell Line    | -      | -       | -     |                |
| 36     | GCT44 (YST)            | CL-36  | -                 | Cell Line    | -      | -       | -     |                |
| 37     | PA-1 (IT)              | CL-37  | -                 | Cell Line    | -      | -       | -     |                |
| 38     | 1411H (YST)            | CL-38  | -                 | Cell Line    | -      | -       | -     |                |
| 39     | TCam-2 (seminoma)      | CL-39  | -                 | Cell Line    | -      | -       | -     |                |
| 40     | 2102Ep (EC)            | CL-40  | -                 | Cell Line    | -      | -       | -     |                |
| 41     | Normal (pre-pubertal)  | N-41   | -                 | Testis       | M      | 9       | -     | ✓*             |
| 42     | Normal (pre-pubertal)  | N-42   | -                 | Ovary        | F      | 7       | -     |                |
| 43     | Normal (post-pubertal) | N-43   | -                 | Testis       | M      | 27      | -     | ✓*             |
| 44     | Normal (post-pubertal) | N-44   | -                 | Ovary        | F      | 43      | -     | ✓*             |
| 45     | Developmental (fetal)  | D-45   | -                 | Yolk sac     | N/A    | -       | -     |                |
| 46     | Developmental (fetal)  | D-46   | -                 | Yolk sac     | F      | -       | -     |                |
| 47     | Developmental (fetal)  | D-47   | -                 | Ovary        | F      | -       | -     |                |
| 48     | Developmental (fetal)  | D-48   | -                 | Ovary        | F      | -       | -     |                |

Key

YST – yolk sac tumor

EC – embryonal carcinoma

IT – immature teratoma

MT – mature teratoma

SCT – sacrococcygeal teratoma

CNS - central nervous system

Staging – according to tumor-node metastasis system

# from gonadal primary

\* mRNA profiles previously unpublished

## Palmer\_Suppl\_Table\_S2A

| (A) List of differentiating miRNAs for pediatric GCTs versus non-malignant tissues, ranked by adjusted <i>p</i> -value |                  |                          |                 |                  |                          |
|------------------------------------------------------------------------------------------------------------------------|------------------|--------------------------|-----------------|------------------|--------------------------|
| Over-expressed                                                                                                         | Log2 fold change | Adjusted <i>p</i> -value | Under-expressed | Log2 fold change | Adjusted <i>p</i> -value |
| hsa-miR-302a                                                                                                           | 4.40881897       | 6.28E-15                 | hsa-miR-152     | -2.063914854     | 5.09E-09                 |
| hsa-miR-373                                                                                                            | 5.391576539      | 2.55E-14                 | hsa-miR-204     | -2.955600047     | 2.32E-08                 |
| hsa-miR-367                                                                                                            | 5.095098475      | 2.55E-14                 | hsa-miR-30d     | -1.811160594     | 6.14E-08                 |
| hsa-miR-302c                                                                                                           | 5.071235772      | 2.55E-14                 | hsa-miR-99a     | -3.470265793     | 9.25E-08                 |
| hsa-miR-371-3p                                                                                                         | 4.309924554      | 2.55E-14                 | hsa-miR-100     | -3.385412435     | 1.23E-07                 |
| hsa-miR-372                                                                                                            | 4.907600543      | 4.09E-14                 | hsa-miR-574-3p  | -1.311926777     | 1.74E-07                 |
| hsa-miR-302d                                                                                                           | 5.080151319      | 6.85E-14                 | hsa-miR-186     | -1.462022893     | 2.09E-07                 |
| hsa-miR-302b                                                                                                           | 4.803575667      | 4.65E-11                 | hsa-miR-30a*    | -1.287810497     | 2.16E-07                 |
| hsa-miR-373*                                                                                                           | 1.653141211      | 5.26E-11                 | hsa-miR-99a*    | -1.417079846     | 2.16E-07                 |
| miRPlus_17892                                                                                                          | 1.074655904      | 1.38E-10                 | hsa-miR-99b     | -1.79882643      | 3.24E-07                 |
| hsa-miR-371-5p                                                                                                         | 1.773515888      | 9.48E-10                 | hsa-let-7e      | -1.147428812     | 4.45E-07                 |
| hsa-miR-940                                                                                                            | 1.577103167      | 2.42E-08                 | miRPlus_11201   | -1.765197447     | 5.25E-07                 |
| hsa-miR-492                                                                                                            | 2.005593571      | 1.25E-07                 | hsa-miR-135a    | -2.131835153     | 6.03E-07                 |
| hsa-miR-520c-3p                                                                                                        | 1.850361383      | 2.58E-07                 | hsa-miR-133a    | -1.791180842     | 7.96E-07                 |
| hsa-miR-584                                                                                                            | 1.432324394      | 2.75E-07                 | hsa-miR-125b    | -3.446981685     | 9.59E-07                 |
| hsa-miR-518e*                                                                                                          | 1.033306037      | 4.57E-07                 | hsa-miR-30a     | -1.823260641     | 1.18E-06                 |
| hsa-miR-96                                                                                                             | 2.09974333       | 4.70E-07                 | hsa-miR-133a/b  | -1.313869601     | 1.20E-06                 |
| hsa-miR-526b*                                                                                                          | 1.718536991      | 5.37E-07                 | hsa-miR-181a    | -1.836798349     | 1.28E-06                 |
| hsa-miR-520b                                                                                                           | 1.817371691      | 1.79E-06                 | hsa-miR-26a     | -1.903180281     | 1.30E-06                 |
| hsa-miR-2110                                                                                                           | 0.897221         | 2.45E-06                 | hsa-miR-125a-5p | -1.917003854     | 1.30E-06                 |
| hsa-miR-182                                                                                                            | 1.99707157       | 3.27E-06                 | hsa-miR-148b    | -1.311449669     | 1.34E-06                 |
| miRPlus_27560                                                                                                          | 1.340802693      | 3.53E-06                 | hsa-miR-133b    | -1.670182579     | 1.52E-06                 |
| hsa-miR-182*                                                                                                           | 0.98155748       | 4.68E-06                 | hsa-miR-542-3p  | -1.499261794     | 1.54E-06                 |
| hsa-miR-638                                                                                                            | 1.04881876       | 5.35E-06                 | hsa-miR-30e*    | -1.478334142     | 1.75E-06                 |
| hsa-miR-602                                                                                                            | 1.079267913      | 9.41E-06                 | hsa-miR-30b     | -1.73375691      | 2.21E-06                 |
| hsa-miR-296-5p                                                                                                         | 0.881107622      | 9.41E-06                 | hsa-miR-140-5p  | -1.771429989     | 2.43E-06                 |
| hsa-miR-766                                                                                                            | 0.886323657      | 1.38E-05                 | hsa-miR-9*      | -2.220975697     | 2.45E-06                 |
| hsa-miR-596                                                                                                            | 1.141276129      | 1.71E-05                 | hsa-miR-9       | -2.511761527     | 2.45E-06                 |
| hsa-miR-623                                                                                                            | 1.094251422      | 2.09E-05                 | hsa-miR-181b    | -1.646891224     | 2.48E-06                 |
| hsa-miR-625*                                                                                                           | 0.766591601      | 2.36E-05                 | hsa-miR-95      | -1.309531872     | 2.50E-06                 |
| hsa-miR-30b*                                                                                                           | 0.988246337      | 2.92E-05                 | hsa-miR-450a    | -2.05887218      | 2.52E-06                 |
| hsa-miR-611                                                                                                            | 1.091602535      | 6.66E-05                 | hsa-miR-128     | -1.437029713     | 3.24E-06                 |
| hsa-miR-183                                                                                                            | 1.220534751      | 0.00016252               | hsa-miR-30c     | -1.687900166     | 3.85E-06                 |
| hsa-miR-512-3p                                                                                                         | 1.166899818      | 0.000250435              | hsa-miR-551b    | -1.70540519      | 4.02E-06                 |
| hsa-miR-483-3p                                                                                                         | 0.771478606      | 0.000359432              | hsa-miR-10a     | -2.151435903     | 4.02E-06                 |
| hsa-miR-515-5p                                                                                                         | 1.297819857      | 0.001558432              | hsa-miR-143*    | -1.103866914     | 5.05E-06                 |
| hsa-miR-518a-5p                                                                                                        | 0.670414831      | 0.001744319              | hsa-miR-361-5p  | -1.113381931     | 6.96E-06                 |
| hsa-miR-520g/h                                                                                                         | 0.933230179      | 0.003021334              | hsa-miR-542-5p  | -1.274237523     | 8.17E-06                 |
| hsa-miR-525-3p                                                                                                         | 0.759966545      | 0.003076572              | miRPlus_17865   | -1.237994138     | 8.99E-06                 |
| hsa-miR-520g                                                                                                           | 0.996606474      | 0.003630444              | hsa-miR-499-5p  | -1.070551543     | 1.18E-05                 |
| hsa-miR-518e                                                                                                           | 0.812909702      | 0.003630444              | hsa-miR-24      | -1.649940986     | 1.18E-05                 |
| hsa-miR-326                                                                                                            | 0.793083538      | 0.004367093              | hsa-miR-27b     | -1.579214896     | 1.19E-05                 |
| hsa-miR-519b-3p                                                                                                        | 0.871038614      | 0.00479448               | hsa-miR-98      | -1.820927515     | 1.21E-05                 |
| hsa-miR-515-3p                                                                                                         | 0.7864083        | 0.006735831              | hsa-miR-320a    | -1.35002557      | 1.22E-05                 |
|                                                                                                                        |                  |                          | hsa-miR-455-5p  | -1.314181524     | 1.36E-05                 |
|                                                                                                                        |                  |                          | hsa-miR-29c*    | -1.030552205     | 1.39E-05                 |
|                                                                                                                        |                  |                          | hsa-miR-424     | -1.977222963     | 1.41E-05                 |
|                                                                                                                        |                  |                          | hsa-miR-101     | -1.540210246     | 1.77E-05                 |

|                          |              |             |
|--------------------------|--------------|-------------|
| hsa-miR-338-3p           | -1.55551537  | 1.82E-05    |
| hsa-miR-23a              | -1.539590735 | 2.12E-05    |
| hsa-miR-30e              | -1.481373131 | 2.21E-05    |
| hsa-miR-132              | -0.904051467 | 2.31E-05    |
| hsa-miR-214              | -1.859451157 | 2.64E-05    |
| hsa-miR-23b              | -1.545640208 | 2.70E-05    |
| hsa-miR-1                | -1.319762454 | 3.55E-05    |
| hsa-miR-15a              | -1.078058994 | 3.76E-05    |
| hsa-miR-218              | -1.762104908 | 3.76E-05    |
| hsa-let-7d               | -1.702406219 | 4.01E-05    |
| hsa-miR-199a-5p          | -2.546090217 | 4.59E-05    |
| hsa-miR-28-5p            | -1.034416571 | 5.05E-05    |
| hsa-miR-199b-5p          | -2.237105202 | 6.75E-05    |
| hsa-miR-191              | -0.943114027 | 6.82E-05    |
| hsa-miR-126*             | -1.320284881 | 6.82E-05    |
| hsa-miR-532-5p           | -1.171268046 | 7.76E-05    |
| hsa-miR-365              | -1.242695944 | 7.90E-05    |
| hsa-miR-449a             | -2.191490569 | 7.97E-05    |
| hsa-miR-660              | -1.297398959 | 8.43E-05    |
| hsa-miR-151-3p           | -1.00968863  | 9.11E-05    |
| hsa-let-7a               | -1.879555586 | 9.19E-05    |
| hsa-miR-199a-3p/-199b-3p | -2.300256702 | 0.00010053  |
| hsa-let-7c               | -1.827521304 | 0.000118464 |
| hsa-miR-127-3p           | -1.505641636 | 0.000121666 |
| hsa-miR-145*             | -1.16571029  | 0.000125045 |
| hsa-miR-33a              | -0.932242702 | 0.00013193  |
| hsa-miR-148a             | -1.194592506 | 0.00013193  |
| hsa-miR-151-5p           | -1.094302081 | 0.000191731 |
| hsa-miR-19b              | -1.125266381 | 0.000192559 |
| hsa-miR-345              | -0.789931824 | 0.000212641 |
| hsa-miR-362-3p           | -1.18482227  | 0.000214283 |
| hsa-miR-374b             | -1.081480092 | 0.000216848 |
| hsa-let-7g               | -1.302735394 | 0.000233943 |
| hsa-miR-429              | -1.416366498 | 0.000250435 |
| hsa-miR-335              | -1.807198014 | 0.000272893 |
| hsa-miR-487b             | -1.180439247 | 0.00028982  |
| hsa-miR-455-3p           | -1.288005301 | 0.000292364 |
| hsa-miR-107              | -0.971983533 | 0.000293809 |
| hsa-miR-136              | -2.079709911 | 0.000321307 |
| hsa-miR-154              | -0.988978824 | 0.000323668 |
| hsa-miR-145              | -1.583851305 | 0.000340837 |
| hsa-let-7b               | -1.782463537 | 0.000340837 |
| hsa-miR-126              | -1.505971686 | 0.000401173 |
| hsa-miR-411              | -1.275501147 | 0.000423169 |
| hsa-miR-193b             | -1.022616906 | 0.00051578  |
| hsa-miR-301a             | -1.370578911 | 0.00055519  |
| hsa-miR-143              | -1.72724441  | 0.000608804 |
| hsa-miR-27a              | -1.117647227 | 0.000621183 |
| hsa-let-7f               | -1.241234002 | 0.000855845 |
| hsa-miR-432              | -1.124149987 | 0.001081931 |
| hsa-miR-337-5p           | -1.457002426 | 0.001081931 |
| hsa-miR-34b*             | -1.709729258 | 0.001081931 |

|                |              |             |
|----------------|--------------|-------------|
| hsa-miR-19a    | -0.88626336  | 0.001182033 |
| hsa-miR-497    | -0.99366573  | 0.001271971 |
| hsa-miR-410    | -1.207216001 | 0.001520246 |
| hsa-miR-10b    | -2.05884951  | 0.001610488 |
| hsa-miR-374a   | -0.82472481  | 0.001744319 |
| hsa-miR-376c   | -1.38391637  | 0.001968038 |
| hsa-miR-377    | -1.553765795 | 0.002034384 |
| hsa-miR-92a    | -0.77149936  | 0.002234204 |
| hsa-miR-369-3p | -1.309403021 | 0.002488963 |
| hsa-let-7i     | -1.163348137 | 0.002625098 |
| hsa-miR-130a   | -1.176215016 | 0.002768451 |
| hsa-miR-34c-5p | -1.371229301 | 0.002768451 |
| hsa-miR-886-3p | -1.532314964 | 0.003005048 |
| hsa-miR-329    | -0.830841521 | 0.003630444 |
| hsa-miR-379    | -1.100975445 | 0.003793949 |
| hsa-miR-376a   | -1.40644061  | 0.003804157 |
| hsa-miR-654-3p | -1.125581978 | 0.00427844  |
| hsa-miR-363    | -1.246808481 | 0.004561884 |
| hsa-miR-32     | -0.997293616 | 0.005379974 |
| miRPlus_17848  | -1.133760683 | 0.005379974 |
| hsa-miR-16     | -0.732855914 | 0.00571899  |
| hsa-miR-708    | -1.32108352  | 0.006735831 |
| hsa-miR-886-5p | -1.15989741  | 0.007095961 |
| hsa-miR-22     | -0.946951307 | 0.007701659 |
| hsa-miR-514    | -1.529529309 | 0.008091386 |
| hsa-miR-491-3p | -0.857364737 | 0.008432708 |

Palmer\_Suppl\_Table\_S2B

| <b>(B) List of differentiating miRNAs for adult malignant GCTs versus non-malignant tissues, ranked by adjusted p-value</b> |              |                         |                        |              |                         |
|-----------------------------------------------------------------------------------------------------------------------------|--------------|-------------------------|------------------------|--------------|-------------------------|
| <b>Over-expressed</b>                                                                                                       | <b>ΔΔ Ct</b> | <b>Adjusted p-value</b> | <b>Under-expressed</b> | <b>ΔΔ Ct</b> | <b>Adjusted p-value</b> |
| hsa-miR-371                                                                                                                 | -11.18       | 1.18E-24                | hsa-miR-133a           | 4.00         | 4.67E-07                |
| hsa-miR-373                                                                                                                 | -10.26       | 1.66E-22                | hsa-miR-133b           | 3.88         | 4.28E-06                |
| hsa-miR-372                                                                                                                 | -10.79       | 4.87E-22                | hsa-miR-100            | 2.20         | 2.65E-05                |
| hsa-miR-302b                                                                                                                | -12.45       | 1.65E-20                | hsa-miR-203            | 4.03         | 3.71E-05                |
| hsa-miR-302d                                                                                                                | -12.41       | 1.65E-20                | hsa-miR-99a            | 2.14         | 1.94E-04                |
| hsa-miR-373*                                                                                                                | -8.72        | 2.85E-20                | hsa-miR-211            | 2.48         | 4.42E-04                |
| hsa-miR-367                                                                                                                 | -12.38       | 8.08E-20                | hsa-miR-145            | 1.89         | 1.12E-03                |
| hsa-miR-302a                                                                                                                | -12.14       | 1.30E-19                | hsa-miR-328            | 1.47         | 7.20E-03                |
| hsa-miR-302c                                                                                                                | -11.41       | 5.62E-17                | hsa-miR-200b           | 2.95         | 9.21E-03                |
| hsa-miR-302b*                                                                                                               | -9.61        | 8.97E-16                | hsa-miR-200a           | 2.95         | 9.69E-03                |
| hsa-miR-182*                                                                                                                | -6.08        | 2.36E-12                |                        |              |                         |
| hsa-miR-96                                                                                                                  | -6.31        | 7.14E-12                |                        |              |                         |
| hsa-miR-302c*                                                                                                               | -7.18        | 2.55E-09                |                        |              |                         |
| hsa-miR-183                                                                                                                 | -5.01        | 2.63E-09                |                        |              |                         |
| hsa-miR-25                                                                                                                  | -3.12        | 6.61E-07                |                        |              |                         |
| hsa-miR-124a                                                                                                                | -4.92        | 1.53E-06                |                        |              |                         |
| hsa-miR-142-3p                                                                                                              | -3.13        | 1.53E-06                |                        |              |                         |
| hsa-miR-105                                                                                                                 | -5.38        | 1.97E-06                |                        |              |                         |
| hsa-miR-19a                                                                                                                 | -2.71        | 2.74E-06                |                        |              |                         |
| hsa-miR-124b                                                                                                                | -3.78        | 1.32E-05                |                        |              |                         |
| hsa-miR-92                                                                                                                  | -2.47        | 2.52E-05                |                        |              |                         |
| hsa-miR-17-3p                                                                                                               | -2.33        | 2.69E-05                |                        |              |                         |
| hsa-miR-142-5p                                                                                                              | -2.65        | 3.23E-05                |                        |              |                         |
| hsa-miR-9                                                                                                                   | -3.50        | 3.51E-05                |                        |              |                         |
| hsa-miR-20                                                                                                                  | -2.70        | 3.71E-05                |                        |              |                         |
| hsa-miR-17-5p                                                                                                               | -2.61        | 7.33E-05                |                        |              |                         |
| hsa-miR-146                                                                                                                 | -2.66        | 1.47E-04                |                        |              |                         |
| hsa-miR-219                                                                                                                 | -2.48        | 3.24E-04                |                        |              |                         |
| hsa-miR-135b                                                                                                                | -2.44        | 3.85E-04                |                        |              |                         |
| hsa-miR-185                                                                                                                 | -1.97        | 3.85E-04                |                        |              |                         |
| hsa-miR-31                                                                                                                  | -2.61        | 3.88E-04                |                        |              |                         |
| hsa-miR-130a                                                                                                                | -1.95        | 8.03E-04                |                        |              |                         |
| hsa-miR-106a                                                                                                                | -2.25        | 8.60E-04                |                        |              |                         |
| hsa-miR-184                                                                                                                 | -2.91        | 1.12E-03                |                        |              |                         |
| hsa-miR-368                                                                                                                 | -1.99        | 2.65E-03                |                        |              |                         |
| hsa-miR-374                                                                                                                 | -1.59        | 3.49E-03                |                        |              |                         |
| hsa-miR-340                                                                                                                 | -1.47        | 3.49E-03                |                        |              |                         |
| hsa-miR-210                                                                                                                 | -1.90        | 3.51E-03                |                        |              |                         |
| hsa-miR-223                                                                                                                 | -2.29        | 3.67E-03                |                        |              |                         |
| hsa-miR-130b                                                                                                                | -1.83        | 8.04E-03                |                        |              |                         |
| hsa-miR-150                                                                                                                 | -2.09        | 8.13E-03                |                        |              |                         |
| hsa-miR-15b                                                                                                                 | -1.60        | 8.39E-03                |                        |              |                         |
| hsa-miR-151                                                                                                                 | -1.93        | 9.13E-03                |                        |              |                         |
| hsa-miR-34a                                                                                                                 | -1.38        | 9.13E-03                |                        |              |                         |
| hsa-miR-330                                                                                                                 | -1.36        | 9.13E-03                |                        |              |                         |
| hsa-miR-342                                                                                                                 | -1.30        | 9.13E-03                |                        |              |                         |

Palmer\_Suppl\_Table\_S3

| List of differentiating miRNAs for pediatric YSTs versus non-malignant tissues, ranked by adjusted <i>p</i> -value |                  |                          |                 |                  |                          |
|--------------------------------------------------------------------------------------------------------------------|------------------|--------------------------|-----------------|------------------|--------------------------|
| Over-expressed                                                                                                     | Log2 fold change | Adjusted <i>p</i> -value | Under-expressed | Log2 fold change | Adjusted <i>p</i> -value |
| hsa-miR-302a                                                                                                       | 6.54289778       | 2.91E-19                 | hsa-miR-152     | -2.042773501     | 4.57E-08                 |
| hsa-miR-302c                                                                                                       | 7.329122262      | 4.80E-18                 | hsa-miR-100     | -3.697534908     | 1.26E-07                 |
| hsa-miR-367                                                                                                        | 7.055124727      | 2.34E-17                 | hsa-miR-186     | -1.628549732     | 1.49E-07                 |
| hsa-miR-302d                                                                                                       | 7.239796082      | 3.10E-17                 | hsa-miR-30d     | -1.83008469      | 2.72E-07                 |
| hsa-miR-302b                                                                                                       | 6.639856943      | 9.49E-14                 | hsa-miR-99a     | -3.511735467     | 3.94E-07                 |
| hsa-miR-375                                                                                                        | 2.404779015      | 2.99E-12                 | hsa-miR-125b    | -3.885864347     | 7.35E-07                 |
| hsa-miR-371-3p                                                                                                     | 3.911797082      | 5.20E-12                 | hsa-miR-30a     | -2.061930414     | 8.46E-07                 |
| hsa-miR-372                                                                                                        | 4.451957649      | 1.24E-11                 | miRPlus_11201   | -1.891356016     | 9.47E-07                 |
| hsa-miR-584                                                                                                        | 2.413254974      | 1.61E-11                 | hsa-miR-204     | -2.629968516     | 1.15E-06                 |
| hsa-miR-373                                                                                                        | 4.619133965      | 2.84E-11                 | hsa-miR-30e     | -2.015923227     | 1.18E-06                 |
| hsa-miR-940                                                                                                        | 2.223217936      | 5.35E-11                 | hsa-miR-101     | -2.016937316     | 1.67E-06                 |
| hsa-miR-373*                                                                                                       | 1.719490873      | 2.16E-10                 | hsa-miR-30a*    | -1.253519869     | 1.77E-06                 |
| hsa-miR-371-5p                                                                                                     | 1.867418793      | 2.88E-09                 | hsa-miR-9       | -2.785484937     | 2.82E-06                 |
| miRPlus_17892                                                                                                      | 1.007872913      | 7.56E-09                 | hsa-miR-135a    | -2.138093612     | 3.29E-06                 |
| hsa-miR-2110                                                                                                       | 1.347598745      | 9.26E-09                 | hsa-miR-26a     | -1.991105185     | 3.54E-06                 |
| hsa-miR-638                                                                                                        | 1.639756406      | 1.22E-08                 | hsa-miR-30e*    | -1.538694007     | 5.44E-06                 |
| hsa-miR-30b*                                                                                                       | 1.687242424      | 2.48E-08                 | hsa-miR-9*      | -2.367416328     | 5.44E-06                 |
| hsa-miR-602                                                                                                        | 1.666387577      | 3.45E-08                 | hsa-miR-574-3p  | -1.163703421     | 6.65E-06                 |
| hsa-miR-492                                                                                                        | 2.331535447      | 3.73E-08                 | hsa-miR-29c*    | -1.202502789     | 8.85E-06                 |
| miRPlus_27560                                                                                                      | 1.884488502      | 5.99E-08                 | hsa-miR-133a    | -1.689636125     | 1.16E-05                 |
| hsa-miR-766                                                                                                        | 1.317204265      | 1.26E-07                 | hsa-miR-181a    | -1.767083461     | 1.34E-05                 |
| hsa-miR-296-5p                                                                                                     | 1.246464399      | 1.87E-07                 | hsa-miR-551b    | -1.770630015     | 1.46E-05                 |
| hsa-miR-625*                                                                                                       | 1.10816539       | 4.58E-07                 | hsa-miR-133a/b  | -1.233367964     | 1.78E-05                 |
| hsa-miR-623                                                                                                        | 1.490438744      | 1.11E-06                 | hsa-miR-99a*    | -1.184592823     | 2.13E-05                 |
| hsa-miR-518e*                                                                                                      | 1.068543336      | 1.41E-06                 | hsa-miR-95      | -1.283341165     | 2.13E-05                 |
| hsa-miR-596                                                                                                        | 1.499826217      | 1.51E-06                 | hsa-miR-30b     | -1.672858026     | 2.16E-05                 |
| hsa-miR-302c*                                                                                                      | 0.979840025      | 1.51E-05                 | hsa-miR-148b    | -1.223245185     | 2.19E-05                 |
| hsa-miR-483-3p                                                                                                     | 1.066965655      | 3.06E-05                 | hsa-miR-140-5p  | -1.71470017      | 2.19E-05                 |
| hsa-miR-720                                                                                                        | 0.870590887      | 0.00092982               | hsa-miR-133b    | -1.562680865     | 2.30E-05                 |
| hsa-miR-611                                                                                                        | 0.943225386      | 0.001291452              | hsa-miR-132     | -1.01890924      | 2.40E-05                 |
| hsa-miR-552                                                                                                        | 0.80761441       | 0.001538917              | hsa-miR-361-5p  | -1.141177719     | 2.67E-05                 |
| hsa-miR-210                                                                                                        | 0.722910245      | 0.003322521              | hsa-miR-128     | -1.400002708     | 2.67E-05                 |
| hsa-miR-326                                                                                                        | 0.869302164      | 0.005507403              | hsa-miR-30c     | -1.646953249     | 3.08E-05                 |
|                                                                                                                    |                  |                          | hsa-let-7e      | -0.949139491     | 4.15E-05                 |
|                                                                                                                    |                  |                          | hsa-miR-33a     | -1.136917234     | 5.30E-05                 |
|                                                                                                                    |                  |                          | hsa-miR-125a-5p | -1.664078183     | 5.55E-05                 |
|                                                                                                                    |                  |                          | hsa-miR-181b    | -1.492073476     | 5.87E-05                 |
|                                                                                                                    |                  |                          | miRPlus_17865   | -1.215975233     | 6.07E-05                 |
|                                                                                                                    |                  |                          | hsa-miR-320a    | -1.332969568     | 7.93E-05                 |
|                                                                                                                    |                  |                          | hsa-miR-98      | -1.784848917     | 8.56E-05                 |
|                                                                                                                    |                  |                          | hsa-let-7d      | -1.815635273     | 8.97E-05                 |
|                                                                                                                    |                  |                          | hsa-miR-99b     | -1.357701166     | 0.000115202              |
|                                                                                                                    |                  |                          | hsa-miR-542-3p  | -1.241520852     | 0.000124621              |
|                                                                                                                    |                  |                          | hsa-miR-151-3p  | -1.117732211     | 0.000125965              |
|                                                                                                                    |                  |                          | hsa-miR-499-5p  | -1.013422768     | 0.000126322              |
|                                                                                                                    |                  |                          | hsa-let-7g      | -1.533397916     | 0.000155338              |
|                                                                                                                    |                  |                          | hsa-miR-191     | -0.99917938      | 0.000159627              |
|                                                                                                                    |                  |                          | hsa-miR-23a     | -1.490384603     | 0.000167087              |
|                                                                                                                    |                  |                          | hsa-miR-24      | -1.512052083     | 0.000189176              |
|                                                                                                                    |                  |                          | hsa-miR-10a     | -1.835411359     | 0.000193376              |
|                                                                                                                    |                  |                          | hsa-miR-143*    | -0.948525776     | 0.00021073               |
|                                                                                                                    |                  |                          | hsa-miR-199a-5p | -2.533483607     | 0.000237846              |
|                                                                                                                    |                  |                          | hsa-miR-27b     | -1.377099294     | 0.000359275              |
|                                                                                                                    |                  |                          | hsa-miR-1       | -1.240369808     | 0.000375119              |

|                              |              |             |
|------------------------------|--------------|-------------|
| hsa-miR-29b                  | -1.828941729 | 0.000375119 |
| hsa-miR-449a                 | -2.191076924 | 0.000375119 |
| hsa-miR-532-5p               | -1.163323063 | 0.000384719 |
| hsa-miR-23b                  | -1.411781638 | 0.00041269  |
| hsa-miR-886-3p               | -2.132770109 | 0.000419329 |
| hsa-miR-19b                  | -1.182803297 | 0.000465795 |
| hsa-miR-335                  | -1.959267225 | 0.000465795 |
| hsa-let-7i                   | -1.556266054 | 0.000542047 |
| hsa-miR-136                  | -2.245006771 | 0.000575497 |
| hsa-let-7c                   | -1.779524281 | 0.000694315 |
| miRPlus_17848                | -1.619889951 | 0.000711299 |
| hsa-miR-199b-5p              | -2.068227229 | 0.000724578 |
| hsa-miR-660                  | -1.220602416 | 0.000738834 |
| miRPlus_28302                | -1.113342034 | 0.000766186 |
| hsa-miR-345                  | -0.79546022  | 0.000783791 |
| hsa-miR-338-3p               | -1.288984933 | 0.000821937 |
| hsa-miR-199a-3p/-<br>199b-3p | -2.16717826  | 0.000824985 |
| hsa-miR-193b                 | -1.108847701 | 0.000830953 |
| hsa-miR-214                  | -1.568054995 | 0.00089293  |
| hsa-miR-886-5p               | -1.668972643 | 0.00092155  |
| hsa-let-7a                   | -1.735816875 | 0.000922488 |
| hsa-miR-542-5p               | -0.979309003 | 0.000927843 |
| hsa-miR-362-3p               | -1.169396902 | 0.000927843 |
| hsa-miR-450a                 | -1.465157518 | 0.00092982  |
| hsa-miR-15a                  | -0.905639851 | 0.001153568 |
| hsa-miR-19a                  | -1.002547282 | 0.001153568 |
| hsa-miR-218                  | -1.476569864 | 0.001181555 |
| hsa-let-7b                   | -1.77909911  | 0.001264325 |
| hsa-miR-28-5p                | -0.864810558 | 0.00148738  |
| hsa-miR-424                  | -1.495908684 | 0.001584961 |
| hsa-miR-590-5p               | -0.80484525  | 0.00167917  |
| hsa-miR-146b-5p              | -1.208258436 | 0.001701829 |
| hsa-miR-340                  | -0.688751086 | 0.001796447 |
| hsa-miR-374b                 | -0.989874262 | 0.001889252 |
| hsa-miR-342-3p               | -1.162189618 | 0.001902944 |
| hsa-miR-127-3p               | -1.286392935 | 0.002285889 |
| hsa-miR-107                  | -0.886473263 | 0.002532382 |
| hsa-miR-27a                  | -1.080272397 | 0.002780355 |
| hsa-miR-145                  | -1.446903684 | 0.0028197   |
| hsa-miR-148a                 | -0.987827839 | 0.003280936 |
| hsa-miR-151-5p               | -0.926967911 | 0.003373061 |
| hsa-miR-146a                 | -1.236954176 | 0.003624457 |
| hsa-miR-491-3p               | -1.079166163 | 0.003737097 |
| hsa-miR-145*                 | -0.932698925 | 0.004081324 |
| hsa-miR-378                  | -0.835109105 | 0.004540026 |
| hsa-miR-29a                  | -1.64489676  | 0.004540026 |
| hsa-miR-337-5p               | -1.387273562 | 0.004767784 |
| hsa-miR-497                  | -0.960039865 | 0.004819097 |
| hsa-miR-487b                 | -0.982434688 | 0.005223749 |
| hsa-miR-517a/b               | -0.872016249 | 0.005968    |
| hsa-miR-135b                 | -1.277783209 | 0.006003971 |
| hsa-miR-365                  | -0.906920347 | 0.006107536 |
| hsa-miR-92a                  | -0.766120094 | 0.00614097  |
| hsa-miR-221                  | -1.229234436 | 0.006642956 |
| hsa-miR-374a                 | -0.784316113 | 0.006912661 |
| hsa-miR-154                  | -0.77976878  | 0.008471443 |
| hsa-miR-155                  | -0.808155629 | 0.008702465 |
| hsa-miR-222                  | -1.193983066 | 0.009445671 |



Palmer\_Suppl\_Table\_S3

| List of differentiating miRNAs for pediatric Seminomas versus non-malignant tissues, ranked by adjusted <i>p</i> -value |                  |                          |                          |                  |                          |
|-------------------------------------------------------------------------------------------------------------------------|------------------|--------------------------|--------------------------|------------------|--------------------------|
| Over-expressed                                                                                                          | Log2 fold change | Adjusted <i>p</i> -value | Under-expressed          | Log2 fold change | Adjusted <i>p</i> -value |
| hsa-miR-371-3p                                                                                                          | 4.812651609      | 1.58E-14                 | hsa-miR-152              | -2.048470712     | 5.80E-08                 |
| hsa-miR-373                                                                                                             | 6.181135608      | 1.58E-14                 | hsa-miR-204              | -2.667766407     | 1.15E-06                 |
| hsa-miR-372                                                                                                             | 5.341612201      | 6.98E-14                 | hsa-miR-99b              | -1.844563552     | 1.51E-06                 |
| hsa-miR-182*                                                                                                            | 2.004639184      | 1.61E-11                 | hsa-miR-574-3p           | -1.225010433     | 3.38E-06                 |
| hsa-miR-96                                                                                                              | 3.420477575      | 1.04E-10                 | hsa-miR-450a             | -2.303235628     | 3.38E-06                 |
| miRPlus_17892                                                                                                           | 1.137471681      | 3.69E-10                 | hsa-miR-99a              | -3.127576351     | 3.38E-06                 |
| hsa-miR-182                                                                                                             | 3.499939066      | 3.69E-10                 | hsa-miR-99a*             | -1.341880557     | 3.39E-06                 |
| hsa-miR-373*                                                                                                            | 1.658642598      | 4.89E-10                 | hsa-miR-100              | -3.067268703     | 3.76E-06                 |
| hsa-miR-302c                                                                                                            | 3.085156462      | 7.59E-08                 | hsa-let-7e               | -1.057632482     | 1.04E-05                 |
| hsa-miR-371-5p                                                                                                          | 1.606952793      | 8.14E-08                 | hsa-miR-542-5p           | -1.396534445     | 1.46E-05                 |
| hsa-miR-302a                                                                                                            | 2.369168826      | 1.84E-07                 | hsa-miR-205              | -2.732884508     | 1.57E-05                 |
| hsa-miR-302d                                                                                                            | 3.132865228      | 1.84E-07                 | hsa-miR-542-3p           | -1.448943017     | 1.77E-05                 |
| hsa-miR-183                                                                                                             | 2.149688931      | 1.98E-07                 | hsa-miR-455-5p           | -1.466023403     | 1.87E-05                 |
| hsa-miR-367                                                                                                             | 2.936587781      | 2.49E-07                 | hsa-miR-133a             | -1.604395096     | 2.85E-05                 |
| hsa-miR-492                                                                                                             | 1.858653465      | 3.38E-06                 | hsa-miR-199b-5p          | -2.701987914     | 3.37E-05                 |
| hsa-miR-302b                                                                                                            | 3.151989378      | 3.38E-06                 | hsa-miR-338-3p           | -1.693580668     | 3.77E-05                 |
| hsa-miR-142-3p                                                                                                          | 2.426748466      | 5.29E-06                 | hsa-miR-181b             | -1.537735498     | 4.74E-05                 |
| hsa-miR-940                                                                                                             | 1.246281077      | 1.04E-05                 | hsa-miR-135a             | -1.812083436     | 4.74E-05                 |
| hsa-miR-142-5p                                                                                                          | 1.866418651      | 7.33E-05                 | hsa-miR-133a/b           | -1.144655826     | 5.85E-05                 |
| hsa-miR-146a                                                                                                            | 1.699379039      | 0.000161206              | hsa-miR-148b             | -1.150111799     | 6.11E-05                 |
| hsa-miR-520c-3p                                                                                                         | 1.151204166      | 0.000962554              | hsa-miR-30a*             | -1.000788792     | 6.56E-05                 |
| hsa-miR-602                                                                                                             | 0.840171452      | 0.001046457              | hsa-miR-181a             | -1.585653358     | 6.75E-05                 |
| hsa-miR-155                                                                                                             | 1.029810549      | 0.001354791              | hsa-miR-133b             | -1.45201128      | 7.18E-05                 |
| hsa-miR-625*                                                                                                            | 0.6079268        | 0.001628409              | hsa-miR-455-3p           | -1.659797221     | 7.18E-05                 |
| hsa-miR-520b                                                                                                            | 1.195237648      | 0.001719475              | hsa-miR-551b             | -1.572599091     | 7.97E-05                 |
| hsa-miR-584                                                                                                             | 0.776966644      | 0.00330463               | hsa-miR-186              | -1.089041879     | 0.000101117              |
| hsa-miR-526b*                                                                                                           | 0.969588038      | 0.003313879              | hsa-miR-429              | -1.745150849     | 0.000101117              |
| hsa-miR-623                                                                                                             | 0.74494365       | 0.005322775              | hsa-miR-214              | -1.917030004     | 0.000101117              |
| hsa-miR-146b-5p                                                                                                         | 1.05233817       | 0.005780377              | hsa-miR-143*             | -1.001533111     | 0.000117601              |
| hsa-miR-296-5p                                                                                                          | 0.557091708      | 0.005807573              | hsa-miR-125b             | -2.779427618     | 0.000118621              |
| hsa-miR-596                                                                                                             | 0.749883196      | 0.005893477              | hsa-miR-424              | -1.907483989     | 0.000130625              |
|                                                                                                                         |                  |                          | hsa-miR-127-3p           | -1.68734885      | 0.000153363              |
|                                                                                                                         |                  |                          | hsa-miR-410              | -1.697534992     | 0.000159198              |
|                                                                                                                         |                  |                          | hsa-miR-199a-5p          | -2.628628341     | 0.000159463              |
|                                                                                                                         |                  |                          | hsa-miR-199a-3p/-199b-3p | -2.46565386      | 0.000217831              |
|                                                                                                                         |                  |                          | hsa-miR-30d              | -1.151266545     | 0.000302545              |
|                                                                                                                         |                  |                          | hsa-miR-200b             | -2.386516073     | 0.000302545              |
|                                                                                                                         |                  |                          | hsa-miR-10a              | -1.770428694     | 0.00031443               |
|                                                                                                                         |                  |                          | hsa-miR-126*             | -1.322724673     | 0.000325711              |
|                                                                                                                         |                  |                          | hsa-miR-218              | -1.646719729     | 0.000449096              |
|                                                                                                                         |                  |                          | hsa-miR-301a             | -1.560869668     | 0.000629098              |
|                                                                                                                         |                  |                          | hsa-miR-23b              | -1.355016166     | 0.00072299               |
|                                                                                                                         |                  |                          | hsa-miR-409-3p           | -1.374385295     | 0.00072299               |
|                                                                                                                         |                  |                          | hsa-miR-24               | -1.337462579     | 0.000843443              |
|                                                                                                                         |                  |                          | hsa-miR-23a              | -1.303549077     | 0.00084515               |
|                                                                                                                         |                  |                          | hsa-miR-654-3p           | -1.534907475     | 0.000942938              |
|                                                                                                                         |                  |                          | hsa-miR-128              | -1.043223461     | 0.001046457              |
|                                                                                                                         |                  |                          | hsa-miR-27b              | -1.25242071      | 0.001046457              |
|                                                                                                                         |                  |                          | hsa-miR-375              | -0.820020886     | 0.001048175              |
|                                                                                                                         |                  |                          | hsa-miR-140-5p           | -1.254635913     | 0.001048175              |
|                                                                                                                         |                  |                          | hsa-miR-145*             | -1.09120171      | 0.001145851              |
|                                                                                                                         |                  |                          | hsa-miR-148a             | -1.123442638     | 0.001145851              |
|                                                                                                                         |                  |                          | hsa-miR-329              | -1.055924236     | 0.001453137              |

|                 |              |             |
|-----------------|--------------|-------------|
| hsa-miR-335     | -1.749677387 | 0.001581921 |
| hsa-miR-95      | -0.892619451 | 0.001586418 |
| hsa-miR-98      | -1.379870694 | 0.001586418 |
| hsa-miR-126     | -1.501297084 | 0.001629855 |
| hsa-miR-1       | -1.0644425   | 0.001784349 |
| hsa-miR-34b*    | -1.845686342 | 0.001792107 |
| miRPlus_11201   | -1.062084315 | 0.001834639 |
| hsa-miR-449a    | -1.84808712  | 0.002075124 |
| hsa-miR-411     | -1.236501797 | 0.002165425 |
| hsa-miR-432     | -1.180625344 | 0.002265375 |
| hsa-miR-196b    | -1.193801041 | 0.002680785 |
| hsa-miR-125a-5p | -1.16301812  | 0.002848386 |
| hsa-miR-26a     | -1.138124042 | 0.003296905 |
| hsa-miR-154     | -0.891241461 | 0.003311939 |
| hsa-miR-499-5p  | -0.729553113 | 0.003746489 |
| hsa-miR-200a    | -1.922154761 | 0.003746489 |
| miRPlus_17865   | -0.823319508 | 0.003897375 |
| hsa-miR-193b    | -0.928129047 | 0.004346682 |
| hsa-miR-369-3p  | -1.393425788 | 0.004346682 |
| hsa-miR-320a    | -0.891537527 | 0.005024825 |
| hsa-miR-379     | -1.212326696 | 0.005024825 |
| hsa-miR-363     | -1.388251512 | 0.005532212 |
| hsa-miR-130b    | -0.944121924 | 0.005570205 |
| hsa-miR-487b    | -0.98126021  | 0.005633421 |
| hsa-miR-34c-5p  | -1.420265208 | 0.005780377 |
| hsa-miR-365     | -0.915293098 | 0.005893477 |
| hsa-miR-9*      | -1.278515417 | 0.005893477 |
| hsa-miR-30b     | -0.983708896 | 0.006032736 |
| hsa-miR-144     | -1.96768362  | 0.006042656 |
| hsa-miR-143     | -1.503578992 | 0.00631759  |
| hsa-miR-451     | -2.037506033 | 0.006708779 |
| hsa-miR-145     | -1.290404729 | 0.007026436 |
| hsa-let-7d      | -1.158184405 | 0.007158717 |
| hsa-miR-337-5p  | -1.305452036 | 0.007555411 |
| hsa-miR-28-5p   | -0.708630697 | 0.00762575  |
| hsa-miR-301b    | -1.039720251 | 0.007806272 |
| hsa-miR-200c    | -1.664543232 | 0.008013761 |
| hsa-miR-132     | -0.573033412 | 0.008742367 |
| hsa-miR-30e*    | -0.782510803 | 0.008742367 |
| hsa-miR-660     | -0.901608161 | 0.009076216 |

Palmer\_Suppl\_Table\_S3

| List of differentiating miRNAs for pediatric EC versus non-malignant tissues, ranked by adjusted p-value |                  |                  |                 |                  |                  |
|----------------------------------------------------------------------------------------------------------|------------------|------------------|-----------------|------------------|------------------|
| Over-expressed                                                                                           | Log2 fold change | Adjusted p-value | Under-expressed | Log2 fold change | Adjusted p-value |
| hsa-miR-520c-3p                                                                                          | 4.601981788      | 9.54E-10         | hsa-miR-30d     | -2.452130546     | 1.44E-05         |
| hsa-miR-526b*                                                                                            | 4.442361265      | 9.54E-10         | hsa-miR-125a-5p | -2.923915259     | 3.49E-05         |
| hsa-miR-520b                                                                                             | 4.707288223      | 4.78E-09         | hsa-miR-204     | -3.569065216     | 3.51E-05         |
| <b>hsa-miR-302a</b>                                                                                      | 4.314390304      | 5.58E-08         | hsa-miR-30a     | -2.568452724     | 9.01E-05         |
| <b>hsa-miR-367</b>                                                                                       | 5.293582919      | 9.23E-08         | hsa-miR-9       | -3.738983611     | 9.01E-05         |
| <b>hsa-miR-373</b>                                                                                       | 5.374460042      | 2.00E-07         | hsa-miR-30b     | -2.544703808     | 9.25E-05         |
| <b>hsa-miR-372</b>                                                                                       | 4.92923178       | 2.00E-07         | miRPlus_11201   | -2.34215201      | 0.000100668      |
| <b>hsa-miR-371-3p</b>                                                                                    | 4.205324971      | 2.00E-07         | hsa-miR-30e*    | -2.113797617     | 0.000101589      |
| hsa-miR-512-3p                                                                                           | 3.605187445      | 2.00E-07         | hsa-miR-30a*    | -1.609122829     | 0.000103331      |
| <b>hsa-miR-302c</b>                                                                                      | 4.799428592      | 2.81E-07         | hsa-miR-30c     | -2.537528565     | 0.000104491      |
| <b>hsa-miR-302d</b>                                                                                      | 4.867792646      | 7.48E-07         | hsa-miR-152     | -2.100500351     | 0.000138101      |
| hsa-miR-525-3p                                                                                           | 2.746318157      | 1.04E-06         | hsa-miR-99a*    | -1.724766157     | 0.000140531      |
| hsa-miR-518e*                                                                                            | 1.810520638      | 1.37E-06         | hsa-miR-26a     | -2.580311617     | 0.000143768      |
| hsa-miR-518e                                                                                             | 2.878014654      | 2.08E-06         | hsa-let-7e      | -1.435514463     | 0.000163543      |
| hsa-miR-515-5p                                                                                           | 4.122415879      | 2.37E-06         | hsa-miR-574-3p  | -1.547066476     | 0.00016414       |
| hsa-miR-520g/h                                                                                           | 3.105956021      | 3.99E-06         | hsa-miR-361-5p  | -1.663843127     | 0.000170642      |
| hsa-miR-520g                                                                                             | 3.363555531      | 4.48E-06         | hsa-miR-99b     | -2.19421457      | 0.000173342      |
| hsa-miR-519b-3p                                                                                          | 3.017863282      | 5.13E-06         | hsa-miR-9*      | -3.016995346     | 0.000237148      |
| hsa-miR-515-3p                                                                                           | 2.718006208      | 1.19E-05         | hsa-miR-186     | -1.66847707      | 0.00027996       |
| <b>hsa-miR-302b</b>                                                                                      | 4.618880681      | 2.73E-05         | hsa-miR-99a     | -3.771485562     | 0.000285319      |
| hsa-miR-518a-5p/-527                                                                                     | 1.862423888      | 2.73E-05         | hsa-miR-95      | -1.752635001     | 0.000288659      |
| miRPlus_17892                                                                                            | 1.078623117      | 2.79E-05         | hsa-miR-140-5p  | -2.344953885     | 0.000298769      |
| <b>hsa-miR-373*</b>                                                                                      | 1.581290161      | 3.18E-05         | hsa-miR-10a     | -2.848467658     | 0.000495793      |
| hsa-miR-521                                                                                              | 2.400851383      | 3.51E-05         | hsa-miR-128     | -1.867862969     | 0.000498942      |
| <b>hsa-miR-371-5p</b>                                                                                    | 1.846176078      | 4.42E-05         | hsa-miR-29c*    | -1.471473643     | 0.000533295      |
| hsa-miR-519e                                                                                             | 1.843377741      | 4.90E-05         | hsa-miR-15a     | -1.648919475     | 0.000545362      |
| hsa-miR-519c-3p                                                                                          | 1.735710428      | 0.000100668      | hsa-miR-126*    | -2.101773583     | 0.000558802      |
| hsa-miR-517a/b                                                                                           | 2.16754604       | 0.000140531      | hsa-miR-135a    | -2.445328412     | 0.000558802      |
| hsa-miR-611                                                                                              | 1.602844004      | 0.001034727      | hsa-miR-133a/b  | -1.563585012     | 0.00055956       |
| hsa-miR-492                                                                                              | 1.826591801      | 0.001772042      | hsa-miR-133a    | -2.079511305     | 0.00055956       |
| hsa-miR-940                                                                                              | 1.261810489      | 0.002618068      | hsa-miR-542-3p  | -1.807321513     | 0.000602986      |
| hsa-miR-2110                                                                                             | 0.940397471      | 0.002618068      | hsa-miR-148b    | -1.560992024     | 0.000608464      |
| miRPlus_27560                                                                                            | 1.430721173      | 0.002709334      | miRPlus_17865   | -1.674687672     | 0.000608464      |
| hsa-miR-96                                                                                               | 1.886214985      | 0.003512085      | hsa-miR-499-5p  | -1.468678748     | 0.000608788      |
| hsa-miR-638                                                                                              | 1.072181534      | 0.004685988      | hsa-miR-455-5p  | -1.826701359     | 0.000608788      |
| hsa-miR-483-3p                                                                                           | 1.021193471      | 0.007660459      | hsa-miR-133b    | -1.995855592     | 0.000608788      |
| hsa-miR-596                                                                                              | 1.174118974      | 0.007893235      | hsa-miR-30e     | -2.130205122     | 0.000608788      |
| hsa-miR-584                                                                                              | 1.106751565      | 0.008601295      | hsa-miR-181a    | -2.157658229     | 0.000613512      |
| hsa-miR-766                                                                                              | 0.879245028      | 0.009145943      | hsa-miR-151-3p  | -1.590365204     | 0.000717021      |
| hsa-miR-296-5p                                                                                           | 0.839766757      | 0.009681867      | hsa-miR-100     | -3.391433694     | 0.000717021      |
| hsa-miR-637                                                                                              | 1.110470588      | 0.009811004      | hsa-miR-320a    | -1.825569616     | 0.000718965      |
|                                                                                                          |                  |                  | hsa-miR-27b     | -2.108124683     | 0.000799365      |
|                                                                                                          |                  |                  | hsa-miR-365     | -1.905874389     | 0.000810529      |
|                                                                                                          |                  |                  | hsa-miR-28-5p   | -1.529808456     | 0.000820345      |
|                                                                                                          |                  |                  | hsa-miR-101     | -2.087518574     | 0.000914769      |
|                                                                                                          |                  |                  | hsa-miR-143*    | -1.361541855     | 0.00099094       |
|                                                                                                          |                  |                  | hsa-miR-151-5p  | -1.761275001     | 0.001008923      |
|                                                                                                          |                  |                  | hsa-miR-19b     | -1.812638705     | 0.001008923      |
|                                                                                                          |                  |                  | hsa-miR-450a    | -2.408223394     | 0.001034727      |
|                                                                                                          |                  |                  | hsa-miR-374b    | -1.745281169     | 0.001067987      |
|                                                                                                          |                  |                  | hsa-miR-181b    | -1.910864698     | 0.001067987      |
|                                                                                                          |                  |                  | hsa-miR-24      | -2.100308295     | 0.001185378      |
|                                                                                                          |                  |                  | hsa-miR-125b    | -3.675653091     | 0.0012594        |
|                                                                                                          |                  |                  | hsa-miR-98      | -2.298062933     | 0.001314047      |

|                |              |             |
|----------------|--------------|-------------|
| hsa-miR-424    | -2.528276217 | 0.001314047 |
| hsa-miR-191    | -1.320833016 | 0.001680729 |
| hsa-miR-16     | -1.564474736 | 0.001990848 |
| hsa-miR-107    | -1.511974646 | 0.001991363 |
| hsa-miR-126    | -2.401420998 | 0.002049022 |
| hsa-let-7a     | -2.637660922 | 0.002049022 |
| hsa-miR-374a   | -1.492411351 | 0.0023492   |
| hsa-miR-132    | -1.12021175  | 0.002454758 |
| hsa-miR-660    | -1.7699863   | 0.002464979 |
| hsa-miR-15b    | -1.384843218 | 0.002578303 |
| hsa-miR-542-5p | -1.44686912  | 0.002618068 |
| hsa-miR-19a    | -1.505346537 | 0.002709334 |
| hsa-miR-532-5p | -1.561651284 | 0.002709334 |
| hsa-miR-1      | -1.654475056 | 0.002709334 |
| hsa-let-7c     | -2.510166888 | 0.002745395 |
| hsa-miR-345    | -1.13711738  | 0.002754222 |
| hsa-let-7d     | -2.133398979 | 0.002914768 |
| hsa-miR-23b    | -1.870122819 | 0.003077262 |
| hsa-miR-23a    | -1.824838526 | 0.003078422 |
| hsa-let-7f     | -2.001385911 | 0.003078422 |
| hsa-miR-455-3p | -1.873960593 | 0.003170218 |
| hsa-miR-362-3p | -1.668898002 | 0.003231837 |
| hsa-miR-218    | -2.163025132 | 0.003231837 |
| hsa-miR-190    | -1.905111239 | 0.003446059 |
| hsa-miR-551b   | -1.772986464 | 0.003449592 |
| hsa-let-7g     | -1.802176135 | 0.003991877 |
| hsa-miR-214    | -2.093268472 | 0.005346026 |
| hsa-miR-145*   | -1.473230235 | 0.005495812 |
| hsa-miR-338-3p | -1.68398051  | 0.005833623 |
| hsa-miR-487b   | -1.577622845 | 0.006186215 |
| hsa-miR-130a   | -1.945675746 | 0.006768078 |
| hsa-miR-148a   | -1.472507041 | 0.006892439 |
| hsa-let-7b     | -2.381182367 | 0.006978842 |
| hsa-miR-363*   | -1.227925818 | 0.007332839 |
| hsa-miR-154    | -1.29592623  | 0.007660459 |
| hsa-miR-497    | -1.47590353  | 0.007745528 |
| hsa-miR-449a   | -2.535307664 | 0.007837204 |
| hsa-miR-33a    | -1.118507104 | 0.008051681 |
| hsa-miR-25     | -1.127454825 | 0.009428618 |
| hsa-miR-145    | -2.014245503 | 0.009474912 |
| hsa-miR-143    | -2.315442168 | 0.009474912 |
| hsa-miR-27a    | -1.497857392 | 0.00953171  |

Palmer\_Suppl\_Table\_S3

| List of differentiating miRNAs for GCT cell lines versus non-malignant tissues, ranked by adjusted <i>p</i> -value |                  |                          |                          |                  |                          |
|--------------------------------------------------------------------------------------------------------------------|------------------|--------------------------|--------------------------|------------------|--------------------------|
| Over-expressed                                                                                                     | Log2 fold change | Adjusted <i>p</i> -value | Under-expressed          | Log2 fold change | Adjusted <i>p</i> -value |
| <b>hsa-miR-302a</b>                                                                                                | 8.11584103       | 4.45E-21                 | hsa-let-7a               | -4.085370292     | 2.64E-08                 |
| <b>hsa-miR-302c</b>                                                                                                | 9.035969901      | 5.90E-20                 | hsa-miR-143              | -4.256262205     | 5.18E-08                 |
| <b>hsa-miR-367</b>                                                                                                 | 9.217500658      | 8.96E-20                 | hsa-miR-126              | -3.582017984     | 6.86E-08                 |
| <b>hsa-miR-302d</b>                                                                                                | 9.06251183       | 3.61E-19                 | hsa-miR-199a-5p          | -4.905425586     | 9.17E-08                 |
| <b>hsa-miR-302b</b>                                                                                                | 8.61411598       | 5.14E-16                 | hsa-miR-199a-3p/-199b-3p | -4.686788424     | 9.98E-08                 |
| <b>hsa-miR-302c*</b>                                                                                               | 2.277740031      | 5.36E-11                 | hsa-miR-125b             | -5.02581113      | 9.98E-08                 |
| hsa-miR-183                                                                                                        | 3.103702958      | 1.61E-08                 | hsa-let-7i               | -3.073871201     | 3.42E-07                 |
| hsa-miR-20b                                                                                                        | 2.430159752      | 4.02E-06                 | hsa-miR-214              | -3.186767293     | 3.71E-07                 |
| hsa-miR-20a                                                                                                        | 2.266088676      | 1.48E-05                 | hsa-miR-100              | -4.074029553     | 4.06E-07                 |
| hsa-miR-96                                                                                                         | 2.693696425      | 1.92E-05                 | hsa-let-7c               | -3.14581953      | 3.89E-06                 |
| hsa-miR-17                                                                                                         | 2.118966428      | 1.92E-05                 | hsa-let-7d               | -2.639049588     | 7.12E-06                 |
| hsa-miR-584                                                                                                        | 1.755662968      | 1.92E-05                 | hsa-miR-451              | -4.323754127     | 1.54E-05                 |
| hsa-miR-106a                                                                                                       | 2.099632021      | 2.50E-05                 | hsa-miR-152              | -1.770841731     | 1.92E-05                 |
| hsa-miR-18b                                                                                                        | 2.232586084      | 6.19E-05                 | hsa-miR-99a              | -3.330764063     | 1.92E-05                 |
| hsa-miR-18a                                                                                                        | 2.319764883      | 7.95E-05                 | hsa-miR-98               | -2.348140339     | 3.01E-05                 |
| <b>hsa-miR-371-3p</b>                                                                                              | 3.303391052      | 9.84E-05                 | hsa-miR-142-3p           | -2.503284003     | 5.40E-05                 |
| hsa-miR-93                                                                                                         | 1.957224932      | 9.84E-05                 | hsa-let-7b               | -2.756240875     | 8.53E-05                 |
| hsa-miR-182                                                                                                        | 2.53172056       | 0.000101219              | hsa-let-7g               | -1.918582301     | 0.000113875              |
| miRPlus_17892                                                                                                      | 1.061487453      | 0.000101219              | hsa-miR-199b-5p          | -2.765912621     | 0.000288238              |
| <b>hsa-miR-372</b>                                                                                                 | 3.828309677      | 0.000113875              | hsa-miR-127-3p           | -1.908285796     | 0.00051277               |
| <b>hsa-miR-373</b>                                                                                                 | 4.009090296      | 0.000133712              | hsa-let-7f               | -1.785526485     | 0.000729142              |
| hsa-miR-15b                                                                                                        | 1.356757313      | 0.000198761              | hsa-miR-136              | -2.722513588     | 0.001063525              |
| <b>hsa-miR-373*</b>                                                                                                | 1.290434634      | 0.000308489              | hsa-miR-377              | -2.485281834     | 0.001088813              |
| hsa-miR-130b                                                                                                       | 1.856607745      | 0.000465668              | hsa-miR-23a              | -1.547227804     | 0.001099141              |
| hsa-miR-525-3p                                                                                                     | 1.492813681      | 0.000635339              | hsa-miR-223              | -1.832147472     | 0.001183554              |
| hsa-miR-34a                                                                                                        | 1.496886411      | 0.000666869              | hsa-miR-154              | -1.186714009     | 0.001661563              |
| hsa-miR-106b                                                                                                       | 1.424832129      | 0.001029536              | hsa-miR-574-3p           | -0.906540085     | 0.001668398              |
| hsa-miR-521                                                                                                        | 1.492239323      | 0.001652654              | hsa-miR-145              | -1.906763823     | 0.001668398              |
| <b>hsa-miR-371-5p</b>                                                                                              | 1.202832929      | 0.001652654              | hsa-miR-450a             | -1.70548986      | 0.001682577              |
| hsa-miR-492                                                                                                        | 1.554398978      | 0.001668398              | hsa-miR-542-5p           | -1.120898735     | 0.001729514              |
| hsa-miR-7                                                                                                          | 1.607298609      | 0.001729514              | hsa-miR-376c             | -2.006031262     | 0.001729514              |
| hsa-miR-340                                                                                                        | 0.880786945      | 0.002016214              | hsa-miR-30d              | -1.247254398     | 0.001840809              |
| hsa-miR-425                                                                                                        | 1.048307057      | 0.002242697              | hsa-miR-369-3p           | -1.946531015     | 0.001840809              |
| hsa-miR-512-3p                                                                                                     | 1.655806207      | 0.002631054              | hsa-miR-23b              | -1.470286429     | 0.001978904              |
| hsa-miR-520b                                                                                                       | 1.865058018      | 0.003713109              | hsa-miR-10a              | -1.87082478      | 0.001986289              |
| hsa-miR-526b*                                                                                                      | 1.673732651      | 0.003890001              | hsa-miR-125a-5p          | -1.494384992     | 0.002000193              |
| hsa-miR-363                                                                                                        | 1.864913592      | 0.004289998              | hsa-miR-144              | -2.729129676     | 0.002081154              |
| hsa-miR-590-5p                                                                                                     | 0.949773264      | 0.004322556              | hsa-miR-24               | -1.434694724     | 0.002588963              |
| hsa-miR-519b-3p                                                                                                    | 1.552321849      | 0.004407237              | hsa-miR-26a              | -1.434528174     | 0.002631054              |
| hsa-miR-92b                                                                                                        | 1.104193826      | 0.004407742              | hsa-miR-337-5p           | -1.844469596     | 0.003114913              |
| hsa-miR-519c-3p                                                                                                    | 1.09105812       | 0.004442193              | hsa-miR-376a             | -2.116853372     | 0.003890001              |
| hsa-miR-519e                                                                                                       | 1.074347727      | 0.004663793              | hsa-miR-326              | -1.099471551     | 0.004370398              |
| hsa-miR-744                                                                                                        | 1.000165187      | 0.004707045              | hsa-miR-126*             | -1.242971176     | 0.004407237              |
| hsa-miR-520c-3p                                                                                                    | 1.661314999      | 0.005053441              | hsa-miR-411              | -1.323037351     | 0.006562223              |
| hsa-miR-520g/h                                                                                                     | 1.517759238      | 0.005053441              | hsa-miR-886-3p           | -2.369838959     | 0.006562223              |
| hsa-miR-520g                                                                                                       | 1.639565072      | 0.005459524              | hsa-miR-886-5p           | -2.057490187     | 0.006563482              |
| hsa-miR-301b                                                                                                       | 1.936337359      | 0.005708586              | miRPlus_11201            | -1.093166446     | 0.006883881              |
| hsa-miR-517a/b                                                                                                     | 1.30054696       | 0.007591869              | hsa-miR-204              | -1.506478819     | 0.008003587              |
| hsa-miR-515-3p                                                                                                     | 1.26872186       | 0.008130181              | hsa-miR-410              | -1.385926934     | 0.008420275              |
| hsa-miR-92a                                                                                                        | 0.925833052      | 0.009205973              | hsa-miR-572              | -0.923388374     | 0.008748737              |
| hsa-miR-375                                                                                                        | 1.498749671      | 0.009553896              | hsa-miR-32*              | -0.818863638     | 0.008905946              |
|                                                                                                                    |                  |                          | hsa-miR-27b              | -1.140252427     | 0.009891562              |

## Palmer\_Suppl\_Table\_S4

| List of differentiating miRNAs for adult YSTs versus non-malignant tissues, ranked by adjusted <i>p</i> -value |                   |                          |                 |                   |                          |
|----------------------------------------------------------------------------------------------------------------|-------------------|--------------------------|-----------------|-------------------|--------------------------|
| Over-expressed                                                                                                 | $\Delta\Delta$ Ct | Adjusted <i>p</i> -value | Under-expressed | $\Delta\Delta$ Ct | Adjusted <i>p</i> -value |
| hsa-miR-302c                                                                                                   | -15.92            | 8.64E-14                 | hsa-miR-100     | 2.00              | 3.56E-03                 |
| hsa-miR-367                                                                                                    | -16.22            | 1.23E-13                 | hsa-miR-99a     | 1.90              | 5.54E-03                 |
| hsa-miR-302a                                                                                                   | -16.18            | 1.23E-13                 |                 |                   |                          |
| hsa-miR-302b*                                                                                                  | -13.57            | 1.23E-13                 |                 |                   |                          |
| hsa-miR-302d                                                                                                   | -16.42            | 1.24E-13                 |                 |                   |                          |
| hsa-miR-302b                                                                                                   | -16.37            | 2.14E-13                 |                 |                   |                          |
| hsa-miR-302c*                                                                                                  | -11.81            | 2.62E-13                 |                 |                   |                          |
| hsa-miR-371                                                                                                    | -11.85            | 2.24E-09                 |                 |                   |                          |
| hsa-miR-373*                                                                                                   | -9.78             | 3.34E-09                 |                 |                   |                          |
| hsa-miR-373                                                                                                    | -11.13            | 3.66E-09                 |                 |                   |                          |
| hsa-miR-372                                                                                                    | -11.72            | 4.12E-09                 |                 |                   |                          |
| hsa-miR-17-5p                                                                                                  | -4.96             | 3.01E-08                 |                 |                   |                          |
| hsa-miR-106a                                                                                                   | -4.51             | 3.54E-07                 |                 |                   |                          |
| hsa-miR-92                                                                                                     | -4.00             | 4.79E-07                 |                 |                   |                          |
| hsa-miR-122a                                                                                                   | -9.81             | 5.01E-07                 |                 |                   |                          |
| hsa-miR-19a                                                                                                    | -3.94             | 1.65E-06                 |                 |                   |                          |
| hsa-miR-17-3p                                                                                                  | -3.64             | 3.59E-06                 |                 |                   |                          |
| hsa-miR-339                                                                                                    | -3.26             | 4.25E-06                 |                 |                   |                          |
| hsa-miR-20                                                                                                     | -4.04             | 4.84E-06                 |                 |                   |                          |
| hsa-miR-144                                                                                                    | -3.83             | 1.26E-05                 |                 |                   |                          |
| hsa-miR-25                                                                                                     | -3.86             | 2.26E-05                 |                 |                   |                          |
| hsa-miR-130a                                                                                                   | -3.57             | 4.06E-05                 |                 |                   |                          |
| hsa-miR-128a                                                                                                   | -2.08             | 4.14E-05                 |                 |                   |                          |
| hsa-miR-182*                                                                                                   | -5.14             | 1.02E-04                 |                 |                   |                          |
| hsa-miR-105                                                                                                    | -4.97             | 1.29E-04                 |                 |                   |                          |
| hsa-miR-107                                                                                                    | -2.52             | 1.97E-04                 |                 |                   |                          |
| hsa-miR-128b                                                                                                   | -1.76             | 2.07E-04                 |                 |                   |                          |
| hsa-miR-185                                                                                                    | -2.92             | 2.13E-04                 |                 |                   |                          |
| hsa-miR-210                                                                                                    | -3.51             | 2.31E-04                 |                 |                   |                          |
| hsa-miR-9                                                                                                      | -4.81             | 2.48E-04                 |                 |                   |                          |
| hsa-miR-130b                                                                                                   | -3.73             | 2.48E-04                 |                 |                   |                          |
| hsa-miR-31                                                                                                     | -4.29             | 3.20E-04                 |                 |                   |                          |
| hsa-miR-103                                                                                                    | -2.29             | 3.39E-04                 |                 |                   |                          |
| hsa-miR-15b                                                                                                    | -3.11             | 3.48E-04                 |                 |                   |                          |
| hsa-miR-96                                                                                                     | -5.36             | 6.81E-04                 |                 |                   |                          |
| hsa-miR-220                                                                                                    | -2.63             | 6.81E-04                 |                 |                   |                          |
| hsa-miR-138                                                                                                    | -2.31             | 7.64E-04                 |                 |                   |                          |
| hsa-miR-183                                                                                                    | -5.05             | 7.78E-04                 |                 |                   |                          |
| hsa-miR-340                                                                                                    | -2.34             | 7.82E-04                 |                 |                   |                          |
| hsa-miR-151                                                                                                    | -2.40             | 7.99E-04                 |                 |                   |                          |
| hsa-miR-126                                                                                                    | -2.12             | 7.99E-04                 |                 |                   |                          |
| hsa-miR-219                                                                                                    | -3.39             | 9.48E-04                 |                 |                   |                          |
| hsa-miR-191                                                                                                    | -2.29             | 9.48E-04                 |                 |                   |                          |
| hsa-miR-190                                                                                                    | -2.98             | 9.81E-04                 |                 |                   |                          |
| has-miR-16                                                                                                     | -2.16             | 1.03E-03                 |                 |                   |                          |
| hsa-miR-124b                                                                                                   | -4.15             | 1.61E-03                 |                 |                   |                          |
| hsa-miR-205                                                                                                    | -5.36             | 1.64E-03                 |                 |                   |                          |
| hsa-miR-30c                                                                                                    | -1.61             | 3.03E-03                 |                 |                   |                          |

|              |       |          |
|--------------|-------|----------|
| hsa-miR-124a | -4.89 | 3.56E-03 |
| hsa-miR-223  | -3.56 | 3.56E-03 |
| hsa-miR-15a  | -1.76 | 3.65E-03 |
| hsa-miR-9*   | -3.53 | 4.19E-03 |
| hsa-miR-330  | -2.09 | 4.23E-03 |
| hsa-miR-139  | -1.34 | 4.77E-03 |
| hsa-miR-374  | -2.29 | 4.87E-03 |
| hsa-miR-331  | -1.89 | 5.29E-03 |
| hsa-miR-30b  | -1.58 | 5.40E-03 |
| hsa-miR-29b  | -1.26 | 8.96E-03 |
| hsa-miR-320  | -1.75 | 9.11E-03 |
| hsa-miR-338  | -2.30 | 9.67E-03 |
| hsa-miR-186  | -1.65 | 9.80E-03 |

Palmer\_Suppl\_Table\_S4

| List of differentiating miRNAs for adult Seminomas versus non-malignant tissues, ranked by adjusted p-value |                   |                  |                 |                   |                  |
|-------------------------------------------------------------------------------------------------------------|-------------------|------------------|-----------------|-------------------|------------------|
| Over-expressed                                                                                              | $\Delta\Delta$ Ct | Adjusted p-value | Under-expressed | $\Delta\Delta$ Ct | Adjusted p-value |
| hsa-miR-371                                                                                                 | -11.04            | 1.09E-16         | hsa-miR-133a    | 5.06              | 2.52E-08         |
| hsa-miR-302b                                                                                                | -10.78            | 1.09E-16         | hsa-miR-133b    | 5.02              | 1.13E-07         |
| hsa-miR-302d                                                                                                | -10.67            | 1.09E-16         | hsa-miR-203     | 5.37              | 9.12E-07         |
| hsa-miR-367                                                                                                 | -10.66            | 1.09E-16         | hsa-miR-200a    | 4.67              | 6.04E-06         |
| hsa-miR-302a                                                                                                | -10.36            | 3.65E-16         | hsa-miR-200b    | 4.84              | 6.36E-06         |
| hsa-miR-373                                                                                                 | -10.25            | 4.19E-16         | hsa-miR-100     | 2.46              | 1.83E-05         |
| hsa-miR-372                                                                                                 | -10.69            | 3.22E-15         | hsa-miR-99a     | 2.44              | 1.77E-04         |
| hsa-miR-373*                                                                                                | -8.22             | 7.65E-15         | hsa-miR-211     | 3.15              | 1.86E-04         |
| hsa-miR-302c                                                                                                | -9.49             | 4.02E-14         | hsa-miR-145     | 2.13              | 3.21E-04         |
| hsa-miR-302b*                                                                                               | -7.82             | 1.81E-13         | hsa-miR-214     | 1.93              | 6.78E-04         |
| hsa-miR-96                                                                                                  | -6.63             | 4.05E-11         | hsa-miR-204     | 2.89              | 1.51E-03         |
| hsa-miR-182*                                                                                                | -6.31             | 1.75E-10         | hsa-miR-199a    | 1.63              | 2.68E-03         |
| hsa-miR-105                                                                                                 | -7.04             | 2.92E-09         | hsa-miR-23b     | 1.47              | 3.61E-03         |
| hsa-miR-302c*                                                                                               | -4.83             | 2.79E-08         | hsa-miR-328     | 1.86              | 3.79E-03         |
| hsa-miR-183                                                                                                 | -5.13             | 5.55E-08         |                 |                   |                  |
| hsa-miR-9                                                                                                   | -4.43             | 2.02E-07         |                 |                   |                  |
| hsa-miR-184                                                                                                 | -4.16             | 9.33E-06         |                 |                   |                  |
| hsa-miR-146                                                                                                 | -3.33             | 1.28E-05         |                 |                   |                  |
| hsa-miR-25                                                                                                  | -3.20             | 1.56E-05         |                 |                   |                  |
| hsa-miR-142-3p                                                                                              | -3.41             | 1.79E-05         |                 |                   |                  |
| hsa-miR-124a                                                                                                | -4.46             | 5.47E-05         |                 |                   |                  |
| hsa-miR-135b                                                                                                | -2.96             | 5.72E-05         |                 |                   |                  |
| hsa-miR-19a                                                                                                 | -2.54             | 1.09E-04         |                 |                   |                  |
| hsa-miR-142-5p                                                                                              | -2.80             | 2.53E-04         |                 |                   |                  |
| hsa-miR-124b                                                                                                | -3.39             | 9.32E-04         |                 |                   |                  |
| hsa-miR-20                                                                                                  | -2.24             | 1.08E-03         |                 |                   |                  |
| hsa-miR-92                                                                                                  | -1.93             | 1.47E-03         |                 |                   |                  |
| hsa-miR-17-3p                                                                                               | -2.00             | 1.94E-03         |                 |                   |                  |
| hsa-miR-342                                                                                                 | -1.72             | 2.77E-03         |                 |                   |                  |
| hsa-miR-151                                                                                                 | -1.76             | 5.43E-03         |                 |                   |                  |
| hsa-miR-9*                                                                                                  | -3.52             | 6.55E-03         |                 |                   |                  |
| hsa-miR-17-5p                                                                                               | -1.81             | 6.55E-03         |                 |                   |                  |
| hsa-miR-374                                                                                                 | -1.67             | 6.55E-03         |                 |                   |                  |
| hsa-miR-29b                                                                                                 | -1.46             | 6.55E-03         |                 |                   |                  |
| hsa-miR-130a                                                                                                | -1.79             | 6.56E-03         |                 |                   |                  |



Palmer\_Suppl\_Table\_S4

| List of differentiating miRNAs for adult EC versus non-malignant tissues, ranked by adjusted p-value |                   |                  |                 |                   |                  |
|------------------------------------------------------------------------------------------------------|-------------------|------------------|-----------------|-------------------|------------------|
| Over-expressed                                                                                       | $\Delta\Delta$ Ct | Adjusted p-value | Under-expressed | $\Delta\Delta$ Ct | Adjusted p-value |
| hsa-miR-302d                                                                                         | -13.21            | 5.76E-15         | hsa-miR-133a    | 3.06              | 4.00E-04         |
| hsa-miR-302c                                                                                         | -12.27            | 1.03E-14         | hsa-miR-203     | 3.55              | 1.68E-03         |
| hsa-miR-302b                                                                                         | -13.19            | 1.52E-14         | hsa-miR-133b    | 2.83              | 4.33E-03         |
| hsa-miR-302a                                                                                         | -13.00            | 2.10E-14         |                 |                   |                  |
| hsa-miR-302b*                                                                                        | -10.55            | 7.81E-14         |                 |                   |                  |
| hsa-miR-367                                                                                          | -13.26            | 9.98E-14         |                 |                   |                  |
| hsa-miR-371                                                                                          | -11.03            | 7.25E-13         |                 |                   |                  |
| hsa-miR-373                                                                                          | -9.78             | 7.25E-13         |                 |                   |                  |
| hsa-miR-302c*                                                                                        | -8.75             | 1.64E-12         |                 |                   |                  |
| hsa-miR-373*                                                                                         | -9.01             | 4.45E-12         |                 |                   |                  |
| hsa-miR-372                                                                                          | -10.44            | 5.30E-12         |                 |                   |                  |
| hsa-miR-182*                                                                                         | -6.21             | 1.22E-08         |                 |                   |                  |
| hsa-miR-96                                                                                           | -6.27             | 8.07E-08         |                 |                   |                  |
| hsa-miR-124a                                                                                         | -5.76             | 3.15E-07         |                 |                   |                  |
| hsa-miR-17-5p                                                                                        | -2.69             | 8.69E-07         |                 |                   |                  |
| hsa-miR-124b                                                                                         | -4.27             | 3.79E-06         |                 |                   |                  |
| hsa-miR-92                                                                                           | -2.54             | 9.15E-06         |                 |                   |                  |
| hsa-miR-17-3p                                                                                        | -2.19             | 9.15E-06         |                 |                   |                  |
| hsa-miR-183                                                                                          | -4.77             | 1.47E-05         |                 |                   |                  |
| hsa-miR-25                                                                                           | -2.57             | 1.96E-05         |                 |                   |                  |
| hsa-miR-19a                                                                                          | -2.33             | 2.25E-05         |                 |                   |                  |
| hsa-miR-106a                                                                                         | -2.42             | 1.14E-04         |                 |                   |                  |
| hsa-miR-219                                                                                          | -2.78             | 2.75E-04         |                 |                   |                  |
| hsa-miR-20                                                                                           | -2.74             | 4.64E-04         |                 |                   |                  |
| hsa-miR-185                                                                                          | -2.17             | 6.61E-04         |                 |                   |                  |
| hsa-miR-142-3p                                                                                       | -2.99             | 7.42E-04         |                 |                   |                  |
| hsa-miR-368                                                                                          | -2.27             | 9.63E-04         |                 |                   |                  |
| hsa-miR-31                                                                                           | -2.56             | 1.17E-03         |                 |                   |                  |
| hsa-miR-142-5p                                                                                       | -2.72             | 1.96E-03         |                 |                   |                  |
| hsa-miR-223                                                                                          | -3.02             | 4.56E-03         |                 |                   |                  |
| hsa-miR-15b                                                                                          | -1.59             | 5.12E-03         |                 |                   |                  |
| hsa-miR-150                                                                                          | -2.50             | 6.09E-03         |                 |                   |                  |
| hsa-miR-105                                                                                          | -2.64             | 6.37E-03         |                 |                   |                  |
| hsa-miR-34a                                                                                          | -1.46             | 7.57E-03         |                 |                   |                  |
| hsa-miR-95                                                                                           | -1.45             | 7.57E-03         |                 |                   |                  |
| hsa-miR-339                                                                                          | -1.09             | 7.57E-03         |                 |                   |                  |
| hsa-miR-299                                                                                          | -1.67             | 8.79E-03         |                 |                   |                  |
| hsa-miR-191                                                                                          | -1.17             | 8.79E-03         |                 |                   |                  |

Palmer\_Suppl\_Table\_S5

| Accession    | Gene Name | Pediatric Rank | Pediatric Log <sub>2</sub> Fold Change | Function<br>OMIM: <a href="http://www.ncbi.nlm.nih.gov/omim/">http://www.ncbi.nlm.nih.gov/omim/</a><br>and<br>GENATLAS: <a href="http://genatlas.medecine.univ-paris5.fr/">http://genatlas.medecine.univ-paris5.fr/</a> |
|--------------|-----------|----------------|----------------------------------------|-------------------------------------------------------------------------------------------------------------------------------------------------------------------------------------------------------------------------|
| NM_012082    | ZFPM2     | 2              | -3.31                                  | ZFP; TF; modulate GATA proteins                                                                                                                                                                                         |
| NM_002937    | RNASE4    | 6              | -2.48                                  | Ribonuclease; mRNA cleavage                                                                                                                                                                                             |
| NM_022648    | TNS1      | 13             | -2.00                                  | Crosslinks actin, adhesion to ECM                                                                                                                                                                                       |
| NM_000944    | PPP3CA    | 14             | -1.98                                  | Protein phosphatase3; negative regulation CDK4 in cell cycle                                                                                                                                                            |
| NM_001018056 | VLDLR     | 15             | -1.97                                  | VLDL receptor; down-regulated in gastric cancer                                                                                                                                                                         |
| NM_032199    | ARID5B    | 16             | -1.97                                  | TF; AT-rich interactive domain 5B                                                                                                                                                                                       |
| NM_001128615 | ARHGEF3   | 19             | -1.91                                  | Rho guanine nucleotide exchange factor 3; signaling                                                                                                                                                                     |
| NM_005324    | H3F3B     | 20             | -1.88                                  | Histone H3 member; nucleosome formation                                                                                                                                                                                 |
| NM_004331    | BNIP3L    | 21             | -1.87                                  | TSG; functional homolog of BNIP3; pro-apoptotic, LOH in cancer                                                                                                                                                          |
| NM_003174    | SVIL      | 23             | -1.78                                  | Bipartite protein; organizes actin/cytoskeletal proteins                                                                                                                                                                |
| NM_001706    | BCL6      | 28             | -1.66                                  | Transcriptional repressor; associated with lymphomas                                                                                                                                                                    |
| NM_003927    | MBD2      | 29             | -1.65                                  | Methyl-CpG-BP; transcriptional repressor and de-methylase                                                                                                                                                               |
| NM_001018009 | SH3BP5    | 32             | -1.61                                  | Negative trans-regulator of BTK signal transduction pathway                                                                                                                                                             |
| NM_015149    | RGL1      | 33             | -1.58                                  | Involved in downstream Ras and Ral signaling pathways                                                                                                                                                                   |
| NM_031490    | LONP2     | 34             | -1.57                                  | Peroxisomal peptidase                                                                                                                                                                                                   |
| NM_016217    | HECA      | 35             | -1.57                                  | Regulation of cell differentiation; deleted in pancreatic cancer                                                                                                                                                        |
| NM_012197    | RABGAP1   | 37             | -1.56                                  | GTPase activator                                                                                                                                                                                                        |
| NM_153367    | ZCCHC24   | 38             | -1.55                                  | ZFP                                                                                                                                                                                                                     |
| NM_001001924 | MTUS1     | 39             | -1.53                                  | Mitochondrial TSG; growth inhibition, low levels in ovarian ca                                                                                                                                                          |

**Key**

TF; transcription factor

BP; binding protein

ZFP; zinc finger protein

MP; membrane protein

TSG; tumor suppressor gene

NR; nuclear receptor

HM; hyper-methylated

ECM extra-cellular matrix

LOH; loss of heterozygosity

Mito/perox; mitochondrial and peroxisomal

## A Pediatric YST vs Control, common SCR present

| GO Term                                     | GOBPID     | Total Genes in GO Term | Gene Count | Expected Gene Count | Adjusted $p$ -value |
|---------------------------------------------|------------|------------------------|------------|---------------------|---------------------|
| Regulation of cellular process              | GO:0050794 | 2943                   | 22         | 12.323              | 1.30E-03            |
| Regulation of biological process            | GO:0050789 | 3033                   | 22         | 12.7                | 2.30E-03            |
| Regulation of S phase of mitotic cell cycle | GO:0007090 | 6                      | 2          | 0.025               | 2.30E-03            |
| Negative regulation of mitotic cell cycle   | GO:0045930 | 8                      | 2          | 0.033               | 4.20E-03            |
| Regulation of S phase                       | GO:0033261 | 10                     | 2          | 0.042               | 6.70E-03            |
| Biological regulation                       | GO:0065007 | 3226                   | 22         | 13.508              | 6.70E-03            |
| S phase of mitotic cell cycle               | GO:0000084 | 12                     | 2          | 0.05                | 9.70E-03            |

## B Pediatric YST vs Control, common SCR absent

| GO Term                               | GOBPID     | Total Genes in GO Term | Gene Count | Expected Gene Count | Adjusted $p$ -value |
|---------------------------------------|------------|------------------------|------------|---------------------|---------------------|
| Fat soluble vitamin metabolic process | GO:0006775 | 6                      | 2          | 0.043               | 5.10E-03            |
| Vitamin A metabolic process           | GO:0006776 | 6                      | 2          | 0.043               | 5.10E-03            |

## C Adult testicular YST vs Control, common SCR absent

| GO Term                                         | GOBPID     | Total Genes in GO Term | Gene Count | Expected Gene Count | Adjusted $p$ -value |
|-------------------------------------------------|------------|------------------------|------------|---------------------|---------------------|
| Spermatogenesis                                 | GO:0007283 | 106                    | 31         | 5.75                | 1.70E-14            |
| Male gamete generation                          | GO:0048232 | 106                    | 31         | 5.75                | 1.70E-14            |
| Sexual reproduction                             | GO:0019953 | 148                    | 36         | 8.03                | 5.30E-14            |
| Reproduction                                    | GO:0000003 | 249                    | 44         | 13.52               | 9.70E-12            |
| Gamete generation                               | GO:0007276 | 131                    | 31         | 7.11                | 9.80E-12            |
| Single fertilization                            | GO:0007338 | 18                     | 7          | 0.98                | 2.00E-04            |
| Fertilization                                   | GO:0009566 | 19                     | 7          | 1.03                | 3.00E-04            |
| Male gonad development                          | GO:0008584 | 11                     | 5          | 0.6                 | 1.30E-03            |
| Spermatid differentiation                       | GO:0048515 | 11                     | 5          | 0.6                 | 1.30E-03            |
| Steroid biosynthetic process                    | GO:0006694 | 44                     | 9          | 2.39                | 3.80E-03            |
| Development of primary male sex characteristics | GO:0046546 | 15                     | 5          | 0.81                | 6.90E-03            |
| Reproductive process                            | GO:0022414 | 135                    | 17         | 7.33                | 7.40E-03            |
| Gonad development                               | GO:0008406 | 31                     | 7          | 1.68                | 8.70E-03            |
| Reproductive structure development              | GO:0048608 | 31                     | 7          | 1.68                | 8.70E-03            |

**A Pediatric Seminoma versus Control, common SCR present**

| GO Term                            | GOBPID     | Total Genes in GO Term | Gene Count | Expected Gene Count | Adjusted $p$ -value |
|------------------------------------|------------|------------------------|------------|---------------------|---------------------|
| Multi-cellular process             | GO:0032501 | 1423                   | 22         | 8.607               | 2.80E-05            |
| Multi-cellular development         | GO:0007275 | 1097                   | 19         | 6.635               | 4.20E-05            |
| Organ morphogenesis                | GO:0009887 | 220                    | 8          | 1.331               | 3.60E-04            |
| System development                 | GO:0048731 | 833                    | 14         | 5.038               | 1.90E-03            |
| Developmental process              | GO:0032502 | 1580                   | 20         | 9.556               | 2.40E-03            |
| Blood vessel morphogenesis         | GO:0048514 | 105                    | 5          | 0.635               | 3.50E-03            |
| Anatomical structure morphogenesis | GO:0009653 | 476                    | 10         | 2.879               | 3.50E-03            |
| Blood vessel development           | GO:0001568 | 118                    | 5          | 0.714               | 5.90E-03            |
| Vasculature development            | GO:0001944 | 119                    | 5          | 0.72                | 6.10E-03            |
| Morphogenesis                      | GO:0016043 | 1059                   | 15         | 6.405               | 6.90E-03            |
| Anatomical structure development   | GO:0048856 | 964                    | 14         | 5.831               | 8.80E-03            |

**B Pediatric Seminoma versus Control, common SCR absent**

| GO Term                  | GOBPID     | Total Genes in GO Term | Gene Count | Expected Gene Count | Adjusted $p$ -value |
|--------------------------|------------|------------------------|------------|---------------------|---------------------|
| Muscle development       | GO:0007517 | 102                    | 6          | 1.155               | 7.80E-03            |
| Multi-cellular process   | GO:0032501 | 1423                   | 28         | 16.11               | 9.00E-03            |
| Malate metabolic process | GO:0006108 | 5                      | 2          | 0.057               | 9.90E-03            |

**C Adult testicular Seminoma versus Control, common SCR absent**

| GO Term                                         | GOBPID     | Total Genes in GO Term | Gene Count | Expected Gene Count | Adjusted $p$ -value |
|-------------------------------------------------|------------|------------------------|------------|---------------------|---------------------|
| Spermatogenesis                                 | GO:0007283 | 106                    | 27         | 5.84                | 6.60E-11            |
| Male gamete generation                          | GO:0048232 | 106                    | 27         | 5.84                | 6.60E-11            |
| Sexual reproduction                             | GO:0019953 | 148                    | 32         | 8.15                | 8.60E-11            |
| Reproduction                                    | GO:0000003 | 249                    | 42         | 13.71               | 2.60E-10            |
| Gamete generation                               | GO:0007276 | 131                    | 27         | 7.21                | 1.20E-08            |
| Single fertilization                            | GO:0007338 | 18                     | 7          | 0.99                | 2.20E-04            |
| Fertilization                                   | GO:0009566 | 19                     | 7          | 1.05                | 3.30E-04            |
| Spermatid development                           | GO:0007286 | 10                     | 5          | 0.55                | 7.90E-04            |
| Reproductive process                            | GO:0022414 | 135                    | 19         | 7.43                | 1.10E-03            |
| Male gonad development                          | GO:0008584 | 11                     | 5          | 0.61                | 1.40E-03            |
| Spermatid differentiation                       | GO:0048515 | 11                     | 5          | 0.61                | 1.40E-03            |
| Sex differentiation                             | GO:0007548 | 43                     | 9          | 2.37                | 3.60E-03            |
| Steroid biosynthetic process                    | GO:0006694 | 44                     | 9          | 2.42                | 4.30E-03            |
| Reproductive developmental process              | GO:0003006 | 46                     | 9          | 2.53                | 6.00E-03            |
| Development of primary male sex characteristics | GO:0046546 | 15                     | 5          | 0.83                | 7.40E-03            |
| Gonad development                               | GO:0008406 | 31                     | 7          | 1.71                | 9.60E-03            |
| Reproductive structure development              | GO:0048608 | 31                     | 7          | 1.71                | 9.60E-03            |

## Palmer\_Suppl\_Table\_S8

A

| Adult TGCT Dataset        | Number of Down-regulated Genes | Down-regulated Genes with Transcript and 3'UTR information | Common SCR Present in 3'UTR | Common SCR Absent in 3'UTR |
|---------------------------|--------------------------------|------------------------------------------------------------|-----------------------------|----------------------------|
| Malignant GCT vs Controls | 1006                           | 825 (82.0%)                                                | 212 (25.7%)                 | 613 (74.3%)                |
| YST vs Controls           | 1083                           | 895 (82.6%)                                                | 247 (27.6%)                 | 648 (72.4%)                |
| Seminoma vs Controls      | 1061                           | 865 (81.5%)                                                | 229 (26.5%)                 | 636 (73.5%)                |

B

## Adult malignant TGCT versus Controls, common SCR absent

| GO Term                                         | GOBPID     | Total Genes in GO Term | Gene Count | Expected Gene Count | Adjusted $p$ -value |
|-------------------------------------------------|------------|------------------------|------------|---------------------|---------------------|
| Sexual reproduction                             | GO:0019953 | 148                    | 31         | 7.28                | 2.20E-11            |
| Spermatogenesis                                 | GO:0007283 | 106                    | 26         | 5.22                | 3.10E-11            |
| Male gamete generation                          | GO:0048232 | 106                    | 26         | 5.22                | 3.10E-11            |
| Reproduction                                    | GO:0000003 | 249                    | 39         | 12.25               | 4.50E-10            |
| Gamete generation                               | GO:0007276 | 131                    | 26         | 6.45                | 4.90E-09            |
| Single fertilization                            | GO:0007338 | 18                     | 8          | 0.89                | 7.00E-06            |
| Fertilization                                   | GO:0009566 | 19                     | 8          | 0.94                | 1.20E-05            |
| Male gonad development                          | GO:0008584 | 11                     | 5          | 0.54                | 7.90E-04            |
| Reproductive process                            | GO:0022414 | 135                    | 17         | 6.64                | 2.40E-03            |
| Development of primary male sex characteristics | GO:0046546 | 15                     | 5          | 0.74                | 4.40E-03            |
| Spermatid development                           | GO:0007286 | 10                     | 4          | 0.49                | 7.50E-03            |
| C-21 steroid hormone process                    | GO:0006700 | 5                      | 3          | 0.25                | 8.50E-03            |
| Prophase                                        | GO:0051324 | 5                      | 3          | 0.25                | 8.50E-03            |
| Steroid biosynthetic process                    | GO:0006694 | 44                     | 8          | 2.17                | 9.20E-03            |

| Gene Name      | Pediatric Rank | Pediatric Log <sub>2</sub> Fold Change | Adult Rank | Adult Log <sub>2</sub> Fold Change | Function<br>OMIM: <a href="http://www.ncbi.nlm.nih.gov/omim/">http://www.ncbi.nlm.nih.gov/omim/</a><br>and<br>GENATLAS: <a href="http://genatlas.medecine.univ-paris5.fr/">http://genatlas.medecine.univ-paris5.fr/</a> |
|----------------|----------------|----------------------------------------|------------|------------------------------------|-------------------------------------------------------------------------------------------------------------------------------------------------------------------------------------------------------------------------|
| <i>GSTM3</i>   | 1              | -3.56                                  | 2          | -5.36                              | Metabolic; mutation in cancer                                                                                                                                                                                           |
| <i>PRNP</i>    | 2              | -3.32                                  | 34         | -3.36                              | Glycosyl-phosphatidyl-inositol-anchored glycoprotein                                                                                                                                                                    |
| <i>PRKAR2B</i> | 3              | -3.07                                  | 35         | -3.35                              | cAMP-dependent protein kinase                                                                                                                                                                                           |
| <i>GOLGA8B</i> | 6              | -2.62                                  | 44         | -3.16                              | Golgi autoantigen, golgin subfamily a, 8B                                                                                                                                                                               |
| <i>OSR2</i>    | 7              | -2.52                                  | 110        | -2.25                              | ZFP;TF; development and patterning                                                                                                                                                                                      |
| <i>DIPP3B</i>  | 8              | -2.50                                  | 23         | -3.68                              | Phospho-hydrolase                                                                                                                                                                                                       |
| <i>NKX3-1</i>  | 9              | -2.49                                  | 25         | -3.64                              | TF; downregulated in TGCTs and prostate cancer                                                                                                                                                                          |
| <i>SEMA3C</i>  | 10             | -2.46                                  | 144        | -2.00                              | Immunoglobulin domain, short basic domain                                                                                                                                                                               |
| <i>NXF3</i>    | 11             | -2.38                                  | 18         | -3.87                              | Nuclear RNA export factor                                                                                                                                                                                               |
| <i>PDZD2</i>   | 12             | -2.33                                  | 20         | -3.83                              | Transmembrane receptor-BP                                                                                                                                                                                               |
| <i>ARAP2</i>   | 13             | -2.19                                  | 104        | -2.27                              | ArfGAP protein that regulates focal adhesion                                                                                                                                                                            |
| <i>FAM13A1</i> | 14             | -2.19                                  | 154        | -1.92                              | Family with sequence similarity 13, A1. Function unknown                                                                                                                                                                |
| <i>SOBP</i>    | 15             | -2.19                                  | 26         | -3.58                              | Nuclear ZFP; cell fate/patterning                                                                                                                                                                                       |
| <i>HSD17B3</i> | 16             | -2.18                                  | 41         | -3.22                              | 17 beta-hydroxysteroid dehydrogenase isoform                                                                                                                                                                            |
| <i>MAP3K5</i>  | 17             | -2.15                                  | 75         | -2.57                              | Activates MAPK; TSG; pro-apoptotic                                                                                                                                                                                      |
| <i>ARID5B</i>  | 18             | -2.10                                  | 182        | -1.74                              | Modulates leptin/adiposity; allow fat accumulation                                                                                                                                                                      |
| <i>HECA</i>    | 19             | -2.08                                  | 105        | -2.27                              | Cytoplasmic protein; regulates mitotic cycle re-entry                                                                                                                                                                   |
| <i>QKI</i>     | 22             | -2.01                                  | 215        | -1.60                              | RNA-BP; RNA export + stability                                                                                                                                                                                          |
| <i>MBNL2</i>   | 23             | -1.95                                  | 128        | -2.09                              | ZFP; regulates alternative splicing in development                                                                                                                                                                      |
| <i>CD47</i>    | 24             | -1.94                                  | 59         | -2.83                              | MP; cell adhesion to ECM                                                                                                                                                                                                |
| <i>AHI-1</i>   | 25             | -1.90                                  | 172        | -1.80                              | Abelson helper integration site; protein:protein interactions                                                                                                                                                           |
| <i>MBD2</i>    | 28             | -1.84                                  | 161        | -1.87                              | Methyl-CpG-BP; transcriptional repressor                                                                                                                                                                                |
| <i>ADCY9</i>   | 29             | -1.78                                  | 166        | -1.82                              | Adenylate cyclase                                                                                                                                                                                                       |
| <i>SLC7A1</i>  | 30             | -1.76                                  | 118        | -2.15                              | Cationic amino acid transporter                                                                                                                                                                                         |
| <i>DIAPH2</i>  | 31             | -1.74                                  | 159        | -1.88                              | Formin homology protein family; actin assembly                                                                                                                                                                          |
| <i>CYP26B1</i> | 32             | -1.73                                  | 66         | -2.77                              | Cytochrome P450 enzyme; deveopment                                                                                                                                                                                      |
| <i>SACS</i>    | 33             | -1.70                                  | 198        | -1.66                              | Sacsin protein                                                                                                                                                                                                          |
| <i>FAM13B</i>  | 34             | -1.70                                  | 123        | -2.13                              | Family with sequence similarity 13, B. Function unknown                                                                                                                                                                 |
| <i>TSPYL2</i>  | 35             | -1.68                                  | 102        | -2.27                              | Nucleosome assembly protein; TF                                                                                                                                                                                         |
| <i>SEPT6</i>   | 38             | -1.62                                  | 53         | -2.89                              | Septin GTPase; actin assembly and cell-cycle arrest                                                                                                                                                                     |
| <i>BNC2</i>    | 40             | -1.60                                  | 188        | -1.71                              | ZFP; TF; downregulated in cancer                                                                                                                                                                                        |
| <i>ENDOD1</i>  | 42             | -1.59                                  | 183        | -1.74                              | Endonuclease, DNase and RNase                                                                                                                                                                                           |
| <i>PER2</i>    | 43             | -1.58                                  | 132        | -2.05                              | Circadian rhythm, HM in cancer                                                                                                                                                                                          |
| <i>BTG3</i>    | 45             | -1.56                                  | 151        | -1.93                              | TSG, transcript regulation, G2/M checkpoint modulator                                                                                                                                                                   |
| <i>MFF</i>     | 47             | -1.51                                  | 106        | -2.27                              | MP; mito/perox fission, apoptosis                                                                                                                                                                                       |

B

| Gene Name     | Pediatric Rank | Pediatric Log <sub>2</sub> Fold Change | Function<br>OMIM: <a href="http://www.ncbi.nlm.nih.gov/omim/">http://www.ncbi.nlm.nih.gov/omim/</a><br>and<br>GENATLAS: <a href="http://genatlas.medecine.univ-paris5.fr/">http://genatlas.medecine.univ-paris5.fr/</a> |
|---------------|----------------|----------------------------------------|-------------------------------------------------------------------------------------------------------------------------------------------------------------------------------------------------------------------------|
| <i>ZFPM2</i>  | 4              | -2.82                                  | ZFP; TF; modulate GATA proteins                                                                                                                                                                                         |
| <i>GAS1</i>   | 5              | -2.73                                  | TSG; growth-arrest specific 1; blocks entry to S phase                                                                                                                                                                  |
| <i>RNASE4</i> | 20             | -2.08                                  | Ribonuclease; mRNA cleavage                                                                                                                                                                                             |
| <i>BNIP3L</i> | 21             | -2.02                                  | TSG; functional homolog of BNIP3; pro-apoptotic, LOH in cancer                                                                                                                                                          |
| <i>WDR33</i>  | 26             | -1.88                                  | Cell cycle; apoptosis; gene regulation                                                                                                                                                                                  |
| <i>TNS1</i>   | 27             | -1.86                                  | Crosslinks actin, adhesion to ECM                                                                                                                                                                                       |
| <i>VLDLR</i>  | 36             | -1.67                                  | VLDL receptor; down-regulated in gastric cancer                                                                                                                                                                         |
| <i>RGL1</i>   | 37             | -1.65                                  | Involved in downstream Ras and Ral signaling pathways                                                                                                                                                                   |
| <i>LONP2</i>  | 39             | -1.61                                  | Peroxisomal peptidase                                                                                                                                                                                                   |
| <i>CORIN</i>  | 41             | -1.59                                  | Serine protease; embryogenesis                                                                                                                                                                                          |
| <i>NR3C1</i>  | 44             | -1.57                                  | TF; glucocorticoid nuclear receptor                                                                                                                                                                                     |
| <i>BCL6</i>   | 46             | -1.54                                  | Transcriptional repressor; associated with lymphomas                                                                                                                                                                    |

### Key

TF; transcription factor

BP; binding protein

ZFP; zinc finger protein

MP; membrane protein

TSG; tumor suppressor gene

NR; nuclear receptor

HM; hyper-methylated

ECM extra-cellular matrix

LOH; loss of heterozygosity

Mito/perox; mitochondrial and peroxisomal

A

| Gene Name      | Pediatric Rank | Pediatric Log <sub>2</sub> Fold Change | Adult Rank | Adult Log <sub>2</sub> Fold Change | Function<br>OMIM: <a href="http://www.ncbi.nlm.nih.gov/omim/">http://www.ncbi.nlm.nih.gov/omim/</a><br>and<br>GENATLAS: <a href="http://genatlas.medecine.univ-paris5.fr/">http://genatlas.medecine.univ-paris5.fr/</a> |
|----------------|----------------|----------------------------------------|------------|------------------------------------|-------------------------------------------------------------------------------------------------------------------------------------------------------------------------------------------------------------------------|
| <i>GJA1</i>    | 1              | -4.24                                  | 74         | -2.44                              | Connexin protein in gap junctions; development                                                                                                                                                                          |
| <i>GSTM3</i>   | 4              | -3.04                                  | 6          | -4.70                              | Metabolic; mutation in cancer                                                                                                                                                                                           |
| <i>OSR2</i>    | 5              | -2.89                                  | 106        | -2.14                              | ZFP; TF; development and patterning                                                                                                                                                                                     |
| <i>AMIGO2</i>  | 7              | -2.76                                  | 120        | -2.04                              | Adhesion molecule                                                                                                                                                                                                       |
| <i>RNASE4</i>  | 8              | -2.74                                  | 170        | -1.71                              | Ribonuclease; mRNA cleavage                                                                                                                                                                                             |
| <i>SEMA3C</i>  | 10             | -2.60                                  | 53         | -2.83                              | Immunoglobulin domain, short basic domain                                                                                                                                                                               |
| <i>NKX3-1</i>  | 11             | -2.57                                  | 22         | -3.73                              | TF; down-regulated in TGCTs and prostate cancer                                                                                                                                                                         |
| <i>PPP3CA</i>  | 14             | -2.40                                  | 141        | -1.89                              | Protein phosphatase 3; negative regulation CDK4                                                                                                                                                                         |
| <i>MBNL2</i>   | 15             | -2.38                                  | 115        | -2.05                              | ZFP; regulates alternative splicing                                                                                                                                                                                     |
| <i>CNN1</i>    | 19             | -2.17                                  | 212        | -1.57                              | Calponin; down-regulated in gastric cancer                                                                                                                                                                              |
| <i>ADCY9</i>   | 20             | -2.15                                  | 208        | -1.58                              | Adenylate cyclase                                                                                                                                                                                                       |
| <i>SOBP</i>    | 22             | -2.12                                  | 73         | -2.47                              | Nuclear ZFP; cell fate/patterning                                                                                                                                                                                       |
| <i>CD99</i>    | 23             | -2.10                                  | 122        | -2.03                              | Cell surface glycoprotein; cell adhesion                                                                                                                                                                                |
| <i>H3F3B</i>   | 25             | -2.06                                  | 229        | -1.51                              | H3 histone, family 3B; nucleosome formation                                                                                                                                                                             |
| <i>PDZD2</i>   | 26             | -2.04                                  | 50         | -2.84                              | Transmembrane receptor-BP                                                                                                                                                                                               |
| <i>ERBB4</i>   | 28             | -1.99                                  | 87         | -2.32                              | Tyrosine protein kinase (HER4)                                                                                                                                                                                          |
| <i>TSC22D1</i> | 29             | -1.93                                  | 136        | -1.91                              | TF; early response gene                                                                                                                                                                                                 |
| <i>RBBP7</i>   | 30             | -1.93                                  | 138        | -1.90                              | Transcriptional repressor; binds RB and BRCA1 TSG                                                                                                                                                                       |
| <i>FAM13A1</i> | 31             | -1.88                                  | 98         | -2.24                              | Family with sequence similarity 13, A1. Function unknown                                                                                                                                                                |
| <i>MAMLD1</i>  | 33             | -1.79                                  | 142        | -1.88                              | Transactivates Hes3 promoter                                                                                                                                                                                            |
| <i>SCCPDH</i>  | 35             | -1.74                                  | 14         | -3.95                              | Saccharopine dehydrogenase                                                                                                                                                                                              |
| <i>CREM</i>    | 39             | -1.62                                  | 15         | -3.94                              | TF; cAMP responsive element modulator                                                                                                                                                                                   |
| <i>DIAPH2</i>  | 42             | -1.59                                  | 158        | -1.80                              | Formin homology protein family; actin assembly                                                                                                                                                                          |
| <i>MARK4</i>   | 46             | -1.53                                  | 176        | -1.69                              | Microtubule affinity regulating kinase 4                                                                                                                                                                                |



B

| Gene Name      | Pediatric Rank | Pediatric Log <sub>2</sub> Fold Change | Function<br>OMIM: <a href="http://www.ncbi.nlm.nih.gov/omim/">http://www.ncbi.nlm.nih.gov/omim/</a><br>and<br>GENATLAS: <a href="http://genatlas.medecine.univ-paris5.fr/">http://genatlas.medecine.univ-paris5.fr/</a> |
|----------------|----------------|----------------------------------------|-------------------------------------------------------------------------------------------------------------------------------------------------------------------------------------------------------------------------|
| <i>ZFPM2</i>   | 2              | -3.53                                  | ZFP; TF; modulate GATA proteins                                                                                                                                                                                         |
| <i>PDGFRA</i>  | 3              | -3.10                                  | Platelet derived growth factor receptor A                                                                                                                                                                               |
| <i>CAV1</i>    | 6              | -2.86                                  | Caveolin 1; cell growth inhibiting protein; negative regulation of RAS                                                                                                                                                  |
| <i>TMEM47</i>  | 9              | -2.68                                  | Transmembrane protein 47; function unknown                                                                                                                                                                              |
| <i>LDLR</i>    | 12             | -2.52                                  | Low density lipoprotein receptor                                                                                                                                                                                        |
| <i>SVIL</i>    | 13             | -2.50                                  | Bipartite protein; organizes actin/cytoskeletal proteins                                                                                                                                                                |
| <i>VLDLR</i>   | 16             | -2.31                                  | VLDL receptor; down-regulated in gastric cancer                                                                                                                                                                         |
| <i>ABLIM1</i>  | 17             | -2.26                                  | Actin-BP                                                                                                                                                                                                                |
| <i>TNS1</i>    | 18             | -2.22                                  | Crosslinks actin, adhesion to ECM                                                                                                                                                                                       |
| <i>PGRMC1</i>  | 21             | -2.13                                  | Progesterone receptor membrane complex 1                                                                                                                                                                                |
| <i>PPAP2B</i>  | 24             | -2.08                                  | Phosphatidic acid phosphatase; germ cell migration                                                                                                                                                                      |
| <i>MGAT1</i>   | 27             | -2.04                                  | Mono-acyl-glycerol acyl-transferase; diacyl-glycerol synthesis                                                                                                                                                          |
| <i>F3</i>      | 32             | -1.85                                  | Tissue factor III (thromboplastin)                                                                                                                                                                                      |
| <i>ZCCHC24</i> | 34             | -1.77                                  | ZFP                                                                                                                                                                                                                     |
| <i>HEG1</i>    | 36             | -1.66                                  | HEG homolog 1; function unknown                                                                                                                                                                                         |
| <i>EPAS1</i>   | 37             | -1.65                                  | TF; endothelial PAS protein; also called hypoxia inducible factor 2 alpha                                                                                                                                               |
| <i>PTPRD</i>   | 38             | -1.63                                  | Protein tyrosine phosphatase receptor D; down-regulated in neuroblastoma                                                                                                                                                |
| <i>MID1</i>    | 40             | -1.62                                  | TF; midline 1 ring finger protein; patterning                                                                                                                                                                           |
| <i>SPG20</i>   | 41             | -1.59                                  | Spartin; interacts with microtubules                                                                                                                                                                                    |
| <i>BCL6</i>    | 43             | -1.58                                  | Transcriptional repressor; associated with lymphomas                                                                                                                                                                    |
| <i>MTUS1</i>   | 44             | -1.57                                  | Mitochondrial TSG 1; growth inhibition, low levels in ovarian cancer                                                                                                                                                    |
| <i>SPARC</i>   | 45             | -1.56                                  | Osteonectin; inhibitor of cell proliferation                                                                                                                                                                            |
| <i>GNG12</i>   | 47             | -1.53                                  | Guanine nucleotide-BP; signal transducer                                                                                                                                                                                |
| <i>BACE1</i>   | 48             | -1.53                                  | Beta-secretase; cleaves amyloid precursor protein                                                                                                                                                                       |
| <i>SH3BP5</i>  | 49             | -1.53                                  | Negative trans-regulator of BTK signal transduction pathway                                                                                                                                                             |
| <i>SNED1</i>   | 50             | -1.51                                  | Sushi, nidogen and EGF-like domains protein 1                                                                                                                                                                           |
| <i>MCFD2</i>   | 51             | -1.51                                  | Paracrine factor in maintaining stem cell potential                                                                                                                                                                     |

## Key

TF; transcription factor

BP; binding protein

ZFP; zinc finger protein

MP; membrane protein

TSG; tumor suppressor gene

NR; nuclear receptor

HM; hyper-methylated

ECM extra-cellular matrix

LOH; loss of heterozygosity

Mito/perox; mitochondrial and peroxisomal
